# Supplementary material
Source: PubMed Central journal article supplement (PMC6405333)

# Supplementary Index

Burger, Sivina, Jain, et al.

**“Randomized trial of ibrutinib versus ibrutinib plus rituximab (Ib+R) in patients with chronic lymphocytic leukemia (CLL).”**

## Table of Contents

|                                                                                                                                        |          |
|----------------------------------------------------------------------------------------------------------------------------------------|----------|
| <b>Supplemental Tables .....</b>                                                                                                       | <b>3</b> |
| Supplemental Table 1. Time on Study Treatment and Time on Study. ITT Population .....                                                  | 3        |
| Supplemental Table 2. Proportion of Subjects with CR/CRi. ITT Population .....                                                         | 4        |
| Supplemental Table 3. Best Response by Subgroup. ITT Population .....                                                                  | 5        |
| Supplemental Table 4. Progression Free Survival (PFS). ITT Population .....                                                            | 6        |
| Supplemental Table 5. Progression Free Survival (PFS) Analysis Results - High Risk Subjects (with 17p Deletion or TP53 Mutation) ..... | 7        |
| ITT Population .....                                                                                                                   | 7        |
| Supplemental Table 6. Progression Free Survival (PFS) Analysis Results - Subjects with 11q Deletion .....                              | 8        |
| ITT Population .....                                                                                                                   | 8        |
| Supplemental Table 7. Overall Survival (OS). ITT Population .....                                                                      | 9        |
| Supplemental Table 8. Event Free Survival (EFS) Analysis Results Adjusting for Stratification Factors .....                            | 10       |
| ITT Population .....                                                                                                                   | 10       |
| Supplemental Table 9. Time to Response (Month) Subgroup Analysis. Responders in ITT Population .....                                   | 11       |
| Supplemental Table 10. Time to CR/CRi (Month). Subjects who had CR/CRi in ITT Population .....                                         | 12       |
| Supplemental Table 11. MRD by Subgroup. ITT Population .....                                                                           | 13       |
| A. Time assessment: 12 months .....                                                                                                    | 13       |
| B. Time assessment: 24 months .....                                                                                                    | 14       |
| Supplemental Table 12. Time to Normalization of Absolute Lymphocyte Count (ALC).....                                                   | 15       |
| ITT Population .....                                                                                                                   | 15       |
| Supplemental Table 13. Descriptive Statistics for ALC (Absolute Lymphocyte Count, K/ $\mu$ L) .....                                    | 16       |
| ITT Population .....                                                                                                                   | 16       |
| Supplemental Table 14. Descriptive Statistics $\beta$ 2 Macroglobulin (mg/L).....                                                      | 19       |
| ITT Population .....                                                                                                                   | 19       |
| Supplemental Table 15. Descriptive Statistics for Igs (mg/dL).....                                                                     | 22       |

|                                                                                                              |           |
|--------------------------------------------------------------------------------------------------------------|-----------|
| ITT Population .....                                                                                         | 22        |
| Supplemental Table 16. Descriptive Statistics for T cells (cells/ $\mu$ L).....                              | 23        |
| ITT Population .....                                                                                         | 23        |
| Supplemental Table 17. Grade 3 or higher Treatment Emergent Adverse Events (TEAE) by Preferred Term.....     | 24        |
| Safety Population .....                                                                                      | 24        |
| Supplemental Table 18. Treatment Emergent Adverse Events (TEAE) by Preferred Term and Maximum Severity ..... | 27        |
| Safety Population .....                                                                                      | 27        |
| Supplemental Table 19. Annualized Discontinuation Rate .....                                                 | 33        |
| Supplemental Table 20. Event Free Survival (EFS) Analysis Results Adjusting for Stratification Factors ..... | 34        |
| Supplemental Table 21. Best Response by Month 12 and Month 24 .....                                          | 35        |
| <b>Supplemental Figures .....</b>                                                                            | <b>36</b> |
| Supplemental Figure 1 .....                                                                                  | 36        |
| Supplemental Figure 2 .....                                                                                  | 37        |
| Supplemental Figure 3 .....                                                                                  | 38        |

## Supplemental Tables

**Supplemental Table 1. Time on Study Treatment and Time on Study. ITT Population**

|                                      | Ibr<br>(N=104)   | Ibr+R<br>(N=104) | Total<br>(N=208) |
|--------------------------------------|------------------|------------------|------------------|
| Time on study treatment (months) [1] |                  |                  |                  |
| n                                    | 104              | 104              | 208              |
| Mean (SD)                            | 28.1 (13.62)     | 26.3 (14.08)     | 27.2 (13.85)     |
| Median                               | 29.7             | 27.4             | 27.9             |
| Min, Max                             | 0.7, 46.7        | 1.1, 47.8        | 0.7, 47.8        |
| <3                                   | 2 (1.9%)         | 8 (7.7%)         | 10 (4.8%)        |
| 3-<6                                 | 7 (6.7%)         | 2 (1.9%)         | 9 (4.3%)         |
| 6-<12                                | 8 (7.7%)         | 10 (9.6%)        | 18 (8.7%)        |
| 12-<24                               | 19 (18.3%)       | 28 (26.9%)       | 47 (22.6%)       |
| 24-<36                               | 31 (29.8%)       | 22 (21.2%)       | 53 (25.5%)       |
| >=36                                 | 37 (35.6%)       | 34 (32.7%)       | 71 (34.1%)       |
| Time on study (months) [2]           |                  |                  |                  |
| n                                    | 104              | 104              | 208              |
| Median (95% CI)                      | 35.8 (32.3,38.9) | 36.4 (32.3,39.1) | 35.8 (33.4,38.9) |
| Min, Max                             | 3.0,47.1         | 2.9+,47.8        | 2.9+,47.8        |

CI= confidence interval. + Indicates censored observation.

[1] Duration of time from the date of first dose of study treatment to the date of last dose of study treatment.

[2] Time on study is based on follow-up time of overall survival using reversed Kaplan-Meier estimates. Subjects who died were censored at death date.

**Supplemental Table 2. Proportion of Subjects with CR/CRi. ITT Population**

|                              | Ibr<br>(N=104)<br>n(%) | Ibr+R<br>(N=104)<br>n(%) | Ibr vs. Ibr+R     |
|------------------------------|------------------------|--------------------------|-------------------|
| All Subjects                 | 21 (20.2)              | 27 (26.0)                |                   |
| Rate difference (95% CI) [1] |                        |                          | -5.8 (-19.6, 8.3) |
| P value [1]                  |                        |                          | 0.3234            |

N = number of subjects in the specified population. n = number of subjects with CR/CRi.

[1] Based on chi-square test.

**Supplemental Table 3. Best Response by Subgroup. ITT Population**

| Subgroups                                | Ibr n(%) |           |           |           | Ibr+R n(%) |           |           |         |
|------------------------------------------|----------|-----------|-----------|-----------|------------|-----------|-----------|---------|
|                                          | N        | CR/CRi    | PR/nPR    | PRL       | N          | CR/CRi    | PR/nPR    | PRL     |
| All subjects                             | 104      | 21 (20.2) | 64 (61.5) | 11 (10.6) | 104        | 27 (26.0) | 65 (62.5) | 4 (3.8) |
| <b>Age, yrs.</b>                         |          |           |           |           |            |           |           |         |
| <65                                      | 51       | 9 (17.6)  | 34 (66.7) | 6 (11.8)  | 48         | 14 (29.2) | 30 (62.5) | 1 (2.1) |
| ≥65                                      | 53       | 12 (22.6) | 30 (56.6) | 5 (9.4)   | 56         | 13 (23.2) | 35 (62.5) | 3 (5.4) |
| <b>Lines of prior treatment</b>          |          |           |           |           |            |           |           |         |
| 0                                        | 15       | 3 (20.0)  | 9 (60.0)  | 2 (13.3)  | 12         | 6 (50.0)  | 6 (50.0)  | 0       |
| 1-2                                      | 68       | 15 (22.1) | 40 (58.8) | 6 (8.8)   | 76         | 19 (25.0) | 47 (61.8) | 4 (5.3) |
| ≥3                                       | 21       | 3 (14.3)  | 15 (71.4) | 3 (14.3)  | 16         | 2 (12.5)  | 12 (75.0) | 0       |
| <b>Del 17p/TP53 mutation (High risk)</b> |          |           |           |           |            |           |           |         |
| Yes                                      | 41       | 9 (22.0)  | 24 (58.5) | 5 (12.2)  | 36         | 12 (33.3) | 23 (63.9) | 1 (2.8) |
| No                                       | 35       | 5 (14.3)  | 21 (60.0) | 4 (11.4)  | 49         | 11 (22.4) | 31 (63.3) | 3 (6.1) |
| <b>Del 11q</b>                           |          |           |           |           |            |           |           |         |
| Yes                                      | 27       | 4 (14.8)  | 20 (74.1) | 1 (3.7)   | 15         | 3 (20.0)  | 10 (66.7) | 1 (6.7) |
| No                                       | 75       | 16 (21.3) | 43 (57.3) | 10 (13.3) | 86         | 24 (27.9) | 53 (61.6) | 3 (3.5) |
| <b>IGVH status</b>                       |          |           |           |           |            |           |           |         |
| Mutated                                  | 26       | 4 (15.4)  | 17 (65.4) | 2 (7.7)   | 22         | 5 (22.7)  | 14 (63.6) | 2 (9.1) |
| Unmutated                                | 61       | 14 (23.0) | 36 (59.0) | 6 (9.8)   | 62         | 18 (29.0) | 38 (61.3) | 2 (3.2) |
| <b>β2 macroglobulin, mg/L</b>            |          |           |           |           |            |           |           |         |
| ≥4                                       | 43       | 10 (23.3) | 28 (65.1) | 1 (2.3)   | 45         | 12 (26.7) | 26 (57.8) | 2 (4.4) |
| <4                                       | 57       | 11 (19.3) | 33 (57.9) | 9 (15.8)  | 57         | 15 (26.3) | 37 (64.9) | 2 (3.5) |
| <b>Rai stage</b>                         |          |           |           |           |            |           |           |         |
| 0-2                                      | 66       | 14 (21.2) | 45 (68.2) | 5 (7.6)   | 62         | 18 (29.0) | 38 (61.3) | 1 (1.6) |
| 3-4                                      | 38       | 7 (18.4)  | 19 (50.0) | 6 (15.8)  | 42         | 9 (21.4)  | 27 (64.3) | 3 (7.1) |

N = number of subjects in each subgroup. n=number of subjects with response. % = n/N.

**Supplemental Table 4. Progression Free Survival (PFS). ITT Population**

| Progression Free Survival (Months)     | Ibr<br>(N=104)    | Ibr+R<br>(N=104)  | Comparison/Difference<br>Ibr vs. Ibr+R |
|----------------------------------------|-------------------|-------------------|----------------------------------------|
| Events - n (%)                         | 15 (14.4)         | 13 (12.5)         |                                        |
| Disease Progression - n                | 10                | 5                 |                                        |
| Death - n                              | 5                 | 8                 |                                        |
| Censored - n (%)                       | 89 (85.6)         | 91 (87.5)         |                                        |
| Median (95% CI) [1]                    | NE (NE, NE)       | NE (NE, NE)       |                                        |
| Min, Max                               | 2.99+, 46.75+     | 2.92, 47.80+      |                                        |
| P value [2]                            |                   |                   | 0.6917                                 |
| Hazard Ratio (95% CI) [3]              |                   |                   | 1.162 (0.553, 2.443)                   |
| PFS at landmark times - % (95% CI) [1] |                   |                   |                                        |
| 6 months                               | 99.0 (93.3, 99.9) | 98.1 (92.5, 99.5) | 1.0 (-2.3, 4.2)                        |
| 12 months                              | 97.0 (91.1, 99.0) | 98.1 (92.5, 99.5) | -1.0 (-5.2, 3.2)                       |
| 15 months                              | 95.0 (88.4, 97.9) | 95.0 (88.4, 97.9) | 0.0 (-6.0, 6.1)                        |
| 18 months                              | 95.0 (88.4, 97.9) | 95.0 (88.4, 97.9) | 0.0 (-6.0, 6.1)                        |
| 24 months                              | 95.0 (88.4, 97.9) | 92.5 (84.9, 96.4) | 2.5 (-4.4, 9.3)                        |
| 30 months                              | 86.0 (76.6, 91.9) | 89.8 (81.1, 94.6) | -3.7 (-13.5, 6.1)                      |
| 36 months                              | 86.0 (76.6, 91.9) | 86.9 (77.3, 92.6) | -0.8 (-11.3, 9.6)                      |

CI= confidence interval. + Indicates censored observation. NE = not estimable.

[1] Estimated by Kaplan-Meier method.

[2] P value is from unstratified log-rank test.

[3] Hazard ratio is estimated using unstratified Cox regression model.

**Supplemental Table 5. Progression Free Survival (PFS) Analysis Results - High Risk Subjects (with 17p Deletion or TP53 Mutation)**

**ITT Population**

| Progression Free Survival (Months)     | Ibr<br>(N=41)     | Ibr+R<br>(N=36)   | Comparison/Difference<br>Ibr vs. Ibr+R |
|----------------------------------------|-------------------|-------------------|----------------------------------------|
| Events - n (%)                         | 10 (24.4)         | 8 (22.2)          |                                        |
| Disease Progression - n                | 6                 | 2                 |                                        |
| Death - n                              | 4                 | 6                 |                                        |
| Censored - n (%)                       | 31 (75.6)         | 28 (77.8)         |                                        |
| Median (95% CI) [1]                    | NE (42.6, NE)     | NE (NE, NE)       |                                        |
| Min, Max                               | 5.36, 46.75+      | 13.34, 46.32+     |                                        |
| P value [2]                            |                   |                   | 0.7788                                 |
| Hazard Ratio (95% CI) [3]              |                   |                   | 1.143 (0.451, 2.897)                   |
| PFS at landmark times - % (95% CI) [1] |                   |                   |                                        |
| 6 months                               | 97.6 (83.9, 99.7) | 100.0 (NE, NE)    | -2.4 (-7.2, 2.3)                       |
| 12 months                              | 92.7 (79.0, 97.6) | 100.0 (NE, NE)    | -7.3 (-15.3, 0.7)                      |
| 15 months                              | 90.1 (75.7, 96.2) | 94.4 (79.3, 98.6) | -4.3 (-16.2, 7.7)                      |
| 18 months                              | 90.1 (75.7, 96.2) | 94.4 (79.3, 98.6) | -4.3 (-16.2, 7.7)                      |
| 24 months                              | 90.1 (75.7, 96.2) | 87.7 (70.3, 95.2) | 2.4 (-12.2, 17.0)                      |
| 30 months                              | 77.7 (60.0, 88.3) | 80.4 (61.2, 90.8) | -2.7 (-22.6, 17.2)                     |
| 36 months                              | 77.7 (60.0, 88.3) | 73.1 (53.0, 85.6) | 4.6 (-16.7, 25.9)                      |

CI= confidence interval. + Indicates censored observation. NE = not estimable.

[1] Estimated by Kaplan-Meier method.

[2] P value is from unstratified log-rank test.

[3] Hazard ratio is estimated using unstratified Cox regression model.

**Supplemental Table 6. Progression Free Survival (PFS) Analysis Results - Subjects with 11q Deletion**

**ITT Population**

| Progression Free Survival (Months)     | Ibr<br>(N=27)     | Ibr+R<br>(N=15) | Comparison/Difference<br>Ibr vs. Ibr+R |
|----------------------------------------|-------------------|-----------------|----------------------------------------|
| Events - n (%)                         | 3 (11.1)          | 0               |                                        |
| Disease Progression - n                | 2                 | 0               |                                        |
| Death - n                              | 1                 | 0               |                                        |
| Censored - n (%)                       | 24 (88.9)         | 15 (100.0)      |                                        |
| Median (95% CI) [1]                    | NE (42.6, NE)     | NE (NE, NE)     |                                        |
| Min, Max                               | 2.99+, 44.85+     | 11.33+, 45.77+  |                                        |
| P value [2]                            |                   |                 | 0.2248                                 |
| Hazard Ratio (95% CI) [3]              |                   |                 | (0.374, 30.465)                        |
| PFS at landmark times - % (95% CI) [1] |                   |                 |                                        |
| 6 months                               | 100.0 (NE, NE)    | 100.0 (NE, NE)  | 0.0 (0.0, 0.0)                         |
| 12 months                              | 100.0 (NE, NE)    | 100.0 (NE, NE)  | 0.0 (0.0, 0.0)                         |
| 15 months                              | 100.0 (NE, NE)    | 100.0 (NE, NE)  | 0.0 (0.0, 0.0)                         |
| 18 months                              | 100.0 (NE, NE)    | 100.0 (NE, NE)  | 0.0 (0.0, 0.0)                         |
| 24 months                              | 100.0 (NE, NE)    | 100.0 (NE, NE)  | 0.0 (0.0, 0.0)                         |
| 30 months                              | 94.7 (68.1, 99.2) | 100.0 (NE, NE)  | -5.3 (-15.3, 4.8)                      |
| 36 months                              | 94.7 (68.1, 99.2) | 100.0 (NE, NE)  | -5.3 (-15.3, 4.8)                      |

CI= confidence interval. + Indicates censored observation. NE = not estimable.

[1] Estimated by Kaplan-Meier method.

[2] P value is from unstratified log-rank test.

[3] Hazard ratio is estimated using unstratified Cox regression model.



**Supplemental Table 7. Overall Survival (OS). ITT Population**

| Overall Survival (Months)             | Ibr<br>(N=104)    | Ibr+R<br>(N=104)  | Comparison/Difference<br>Ibr vs. Ibr+R |
|---------------------------------------|-------------------|-------------------|----------------------------------------|
| Death - n (%)                         | 7 (6.7)           | 9 (8.7)           |                                        |
| Censored - n (%)                      | 97 (93.3)         | 95 (91.3)         |                                        |
| Median (95% CI) [1]                   | NE (NE, NE)       | NE (NE, NE)       |                                        |
| Min, Max                              | 2.99+, 47.08+     | 2.92, 47.80+      |                                        |
| P value [2]                           |                   |                   | 0.5722                                 |
| Hazard Ratio (95% CI) [3]             |                   |                   | 0.753 (0.280, 2.022)                   |
| OS at landmark times - % (95% CI) [1] |                   |                   |                                        |
| 6 months                              | 99.0 (93.3, 99.9) | 98.1 (92.5, 99.5) | 1.0 (-2.3, 4.2)                        |
| 12 months                             | 99.0 (93.3, 99.9) | 98.1 (92.5, 99.5) | 1.0 (-2.3, 4.2)                        |
| 15 months                             | 98.0 (92.3, 99.5) | 97.0 (91.1, 99.0) | 1.0 (-3.3, 5.3)                        |
| 18 months                             | 98.0 (92.3, 99.5) | 97.0 (91.1, 99.0) | 1.0 (-3.3, 5.3)                        |
| 24 months                             | 98.0 (92.3, 99.5) | 93.4 (85.8, 97.0) | 4.6 (-1.2, 10.4)                       |
| 30 months                             | 91.8 (83.5, 96.0) | 90.7 (82.1, 95.3) | 1.1 (-7.4, 9.7)                        |
| 36 months                             | 91.8 (83.5, 96.0) | 89.2 (80.1, 94.3) | 2.6 (-6.4, 11.5)                       |

CI= confidence interval. + Indicates censored observation. NE = not estimable.

[1] Estimated by Kaplan-Meier method.

[2] P value is from unstratified log-rank test.

[3] Hazard ratio is estimated using unstratified Cox regression model.

**Supplemental Table 8. Event Free Survival (EFS) Analysis Results Adjusting for Stratification Factors**

**ITT Population**

| Event Free Survival (Months)           | Ibr<br>(N=104)    | Ibr+R<br>(N=104)  | Comparison/Difference<br>Ibr vs. Ibr+R |
|----------------------------------------|-------------------|-------------------|----------------------------------------|
| Events - n (%)                         | 15 (14.4)         | 13 (12.5)         |                                        |
| Disease Progression                    | 10                | 5                 |                                        |
| Death                                  | 5                 | 8                 |                                        |
| Censored - n (%)                       | 89 (85.6)         | 91 (87.5)         |                                        |
| Median (95% CI) [1]                    | NE (NE, NE)       | NE (NE, NE)       |                                        |
| Min, Max                               | 2.99+, 46.75+     | 2.92, 47.80+      |                                        |
| P value [2]                            |                   |                   | 0.9115                                 |
| Hazard Ratio (95% CI) [3]              |                   |                   | 1.043 (0.494, 2.203)                   |
| EFS at landmark times - % (95% CI) [1] |                   |                   |                                        |
| 6 months                               | 99.0 (93.3, 99.9) | 98.1 (92.5, 99.5) | 1.0 (-2.3, 4.2)                        |
| 12 months                              | 97.0 (91.1, 99.0) | 98.1 (92.5, 99.5) | -1.0 (-5.2, 3.2)                       |
| 15 months                              | 95.0 (88.4, 97.9) | 95.0 (88.4, 97.9) | 0.0 (-6.0, 6.1)                        |
| 18 months                              | 95.0 (88.4, 97.9) | 95.0 (88.4, 97.9) | 0.0 (-6.0, 6.1)                        |
| 24 months                              | 95.0 (88.4, 97.9) | 92.5 (84.9, 96.4) | 2.5 (-4.4, 9.3)                        |
| 30 months                              | 86.0 (76.6, 91.9) | 89.8 (81.1, 94.6) | -3.7 (-13.5, 6.1)                      |
| 36 months                              | 86.0 (76.6, 91.9) | 86.9 (77.3, 92.6) | -0.8 (-11.3, 9.6)                      |

CI= confidence interval. + Indicates censored observation. NE = not estimable.

[1] Estimated by Kaplan-Meier method.

[2] P value is from stratified log-rank test.

[3] Hazard ratio is estimated using stratified Cox regression model.

The randomization stratification factor used in both stratified log-rank test and Cox regression model is high-risk status based on del17p, del11q and TP53 mutation (yes, no). ECOG is not used because all subjects had ECOG

**Supplemental Table 9. Time to Response (Month) Subgroup Analysis. Responders in ITT Population**

| Subgroups                         | Ibr |            |                  | Ibr+R |            |                  |
|-----------------------------------|-----|------------|------------------|-------|------------|------------------|
|                                   | n   | Mean (SD)  | Median (Min-Max) | n     | Mean (SD)  | Median (Min-Max) |
| All subjects                      | 96  | 5.0 (1.14) | 4.7 (4.2, 11.8)  | 96    | 5.1 (1.41) | 4.8 (1.9, 11.3)  |
| Age group, yrs.                   |     |            |                  |       |            |                  |
| <65                               | 49  | 5.1 (1.37) | 4.7 (4.2, 11.8)  | 45    | 5.2 (1.64) | 4.8 (1.9, 11.3)  |
| ≥65                               | 47  | 4.9 (0.86) | 4.7 (4.4, 10.3)  | 51    | 5.0 (1.19) | 4.7 (2.9, 11.2)  |
| Lines of prior treatment          |     |            |                  |       |            |                  |
| 0                                 | 14  | 5.3 (1.48) | 4.8 (4.4, 10.3)  | 12    | 5.0 (0.57) | 4.8 (4.6, 6.7)   |
| 1-2                               | 61  | 5.0 (1.24) | 4.7 (4.2, 11.8)  | 70    | 5.2 (1.51) | 4.7 (2.9, 11.3)  |
| ≥3                                | 21  | 4.7 (0.24) | 4.7 (4.4, 5.5)   | 14    | 5.0 (1.48) | 4.9 (1.9, 9.2)   |
| Del 17p/TP53 mutation (High risk) |     |            |                  |       |            |                  |
| Yes                               | 38  | 5.1 (1.45) | 4.8 (4.2, 11.8)  | 36    | 5.4 (1.65) | 4.8 (4.5, 11.2)  |
| No                                | 30  | 5.0 (1.20) | 4.7 (4.5, 11.1)  | 45    | 4.9 (1.40) | 4.7 (1.9, 11.3)  |
| Del 11q                           |     |            |                  |       |            |                  |
| Yes                               | 25  | 4.9 (0.38) | 4.8 (4.5, 6.0)   | 14    | 4.8 (0.24) | 4.7 (4.5, 5.3)   |
| No                                | 69  | 5.1 (1.33) | 4.7 (4.2, 11.8)  | 80    | 5.2 (1.54) | 4.8 (1.9, 11.3)  |
| IGHV status                       |     |            |                  |       |            |                  |
| Mutated                           | 23  | 5.0 (1.17) | 4.8 (4.5, 10.3)  | 21    | 5.4 (1.96) | 4.7 (4.6, 11.3)  |
| Unmutated                         | 56  | 5.1 (1.29) | 4.7 (4.2, 11.8)  | 58    | 4.9 (1.02) | 4.7 (1.9, 11.1)  |
| Beta-2 macroglobulin, mg/L        |     |            |                  |       |            |                  |
| ≥4                                | 39  | 4.8 (0.32) | 4.7 (4.2, 5.9)   | 40    | 5.0 (1.57) | 4.7 (1.9, 11.2)  |
| <4                                | 53  | 5.0 (1.25) | 4.7 (4.4, 11.8)  | 54    | 5.1 (1.20) | 4.8 (4.4, 11.3)  |
| Rai stage                         |     |            |                  |       |            |                  |
| 0-2                               | 64  | 4.9 (0.75) | 4.8 (4.4, 10.3)  | 57    | 5.1 (1.25) | 4.8 (1.9, 11.1)  |
| 3-4                               | 32  | 5.2 (1.68) | 4.6 (4.2, 11.8)  | 39    | 5.2 (1.64) | 4.8 (2.9, 11.3)  |

Time from start of treatment to initial response date of CR/CRi, PR/nPR or PRL.

Responder: subjects with best overall response of CR/CRi, PR/nPR or PRL.

**Supplemental Table 10. Time to CR/CRi (Month). Subjects who had CR/CRi in ITT Population**

| Subgroups                                | Ibr |              |                   | Ibr+R |             |                   |
|------------------------------------------|-----|--------------|-------------------|-------|-------------|-------------------|
|                                          | n   | Mean (SD)    | Median (Min-Max)  | n     | Mean (SD)   | Median (Min-Max)  |
| All subjects                             | 21  | 20.9 (8.02)  | 22.2 (10.5, 44.7) | 27    | 15.2 (6.74) | 11.5 (4.8, 35.5)  |
| <b>Age group, yrs.</b>                   |     |              |                   |       |             |                   |
| <65                                      | 9   | 22.5 (9.70)  | 22.6 (11.1, 44.7) | 14    | 14.8 (5.74) | 12.3 (4.8, 23.0)  |
| ≥65                                      | 12  | 19.7 (6.71)  | 21.5 (10.5, 33.1) | 13    | 15.6 (7.89) | 11.3 (10.3, 35.5) |
| <b>Lines of prior treatment</b>          |     |              |                   |       |             |                   |
| 0                                        | 3   | 15.1 (6.18)  | 12.0 (11.1, 22.2) | 6     | 14.9 (5.34) | 11.6 (11.3, 21.9) |
| 1-2                                      | 15  | 19.7 (5.15)  | 22.6 (10.5, 24.0) | 19    | 16.0 (7.09) | 11.4 (10.3, 35.5) |
| ≥3                                       | 3   | 32.8 (12.01) | 33.1 (20.7, 44.7) | 2     | 8.1 (4.60)  | 8.1 (4.8, 11.3)   |
| <b>Del 17p/TP53 mutation (High risk)</b> |     |              |                   |       |             |                   |
| Yes                                      | 9   | 19.7 (4.72)  | 21.3 (11.1, 23.2) | 12    | 15.7 (8.39) | 11.6 (4.8, 35.5)  |
| No                                       | 5   | 16.4 (6.17)  | 14.3 (10.5, 23.5) | 11    | 15.2 (5.63) | 11.4 (10.3, 23.0) |
| <b>Del 11q</b>                           |     |              |                   |       |             |                   |
| Yes                                      | 4   | 18.1 (6.27)  | 18.6 (11.3, 24.0) | 3     | 15.5 (6.64) | 13.0 (10.4, 23.0) |
| No                                       | 16  | 22.3 (8.16)  | 22.4 (10.5, 44.7) | 24    | 15.1 (6.89) | 11.5 (4.8, 35.5)  |
| <b>IGHV status</b>                       |     |              |                   |       |             |                   |
| Mutated                                  | 4   | 25.5 (5.10)  | 23.3 (22.2, 33.1) | 5     | 11.3 (1.02) | 11.1 (10.3, 13.0) |
| Unmutated                                | 14  | 19.9 (9.03)  | 20.9 (10.5, 44.7) | 18    | 15.4 (7.50) | 11.5 (4.8, 35.5)  |
| <b>β2 macroglobulin, mg/L</b>            |     |              |                   |       |             |                   |
| ≥4                                       | 10  | 19.0 (5.44)  | 21.8 (10.5, 23.2) | 12    | 16.6 (8.56) | 12.3 (4.8, 35.5)  |
| <4                                       | 11  | 22.6 (9.75)  | 22.2 (10.5, 44.7) | 15    | 14.0 (4.83) | 11.3 (10.3, 22.8) |
| <b>Rai stage</b>                         |     |              |                   |       |             |                   |
| 0-2                                      | 14  | 18.2 (6.73)  | 20.7 (10.5, 33.1) | 18    | 13.2 (4.93) | 11.4 (4.8, 22.8)  |
| 3-4                                      | 7   | 26.2 (8.15)  | 23.5 (22.6, 44.7) | 9     | 19.0 (8.39) | 21.9 (11.0, 35.5) |

Time from start of treatment to initial response date of CR/CRi.

**Supplemental Table 11. MRD by Subgroup. ITT Population**

**A. Time assessment: 12 months**

| Subgroups                         | Ibr |    |              |                  | Ibr+R |    |              |                  |
|-----------------------------------|-----|----|--------------|------------------|-------|----|--------------|------------------|
|                                   | N   | n  | Mean (SD)    | Median (Min-Max) | N     | n  | Mean (SD)    | Median (Min-Max) |
| All subjects                      | 104 | 89 | 34.7 (26.26) | 31.0 (0.0, 95.3) | 104   | 88 | 18.2 (20.45) | 10.8 (0.0, 77.0) |
| Age group, yrs.                   |     |    |              |                  |       |    |              |                  |
| <65                               | 51  | 47 | 37.3 (27.74) | 32.0 (0.0, 95.3) | 48    | 43 | 20.8 (22.25) | 14.0 (0.0, 77.0) |
| ≥65                               | 53  | 42 | 31.7 (24.49) | 28.0 (0.0, 93.0) | 56    | 45 | 15.7 (18.47) | 8.8 (0.0, 61.0)  |
| Lines of prior treatment          |     |    |              |                  |       |    |              |                  |
| 0                                 | 15  | 11 | 38.7 (24.75) | 35.0 (0.2, 75.2) | 12    | 11 | 18.2 (19.98) | 15.0 (0.0, 61.0) |
| 1-2                               | 68  | 58 | 31.8 (25.01) | 23.3 (0.1, 93.0) | 76    | 66 | 19.3 (21.61) | 9.7 (0.0, 77.0)  |
| ≥3                                | 21  | 20 | 40.7 (30.35) | 38.0 (0.0, 95.3) | 16    | 11 | 11.6 (12.25) | 9.1 (0.1, 35.8)  |
| Del 17p/TP53 mutation (High risk) |     |    |              |                  |       |    |              |                  |
| Yes                               | 41  | 33 | 30.7 (24.25) | 25.9 (0.2, 95.3) | 36    | 34 | 19.7 (20.53) | 15.0 (0.0, 73.0) |
| No                                | 35  | 29 | 40.8 (25.03) | 45.0 (0.0, 81.0) | 49    | 42 | 20.3 (22.21) | 9.7 (0.0, 77.0)  |
| Del 11q                           |     |    |              |                  |       |    |              |                  |
| Yes                               | 27  | 24 | 33.2 (23.51) | 27.3 (0.0, 71.0) | 15    | 11 | 32.2 (29.54) | 43.3 (1.6, 77.0) |
| No                                | 75  | 63 | 35.1 (27.20) | 32.0 (0.0, 95.3) | 86    | 75 | 16.5 (18.39) | 11.0 (0.0, 75.0) |
| IGHV                              |     |    |              |                  |       |    |              |                  |
| Mutated                           | 26  | 23 | 32.4 (21.51) | 28.8 (0.5, 89.0) | 22    | 19 | 16.2 (17.98) | 8.8 (0.0, 59.3)  |
| Unmutated                         | 61  | 51 | 36.8 (27.71) | 33.4 (0.0, 95.3) | 62    | 55 | 19.9 (21.36) | 12.0 (0.0, 77.0) |
| Beta-2 macroglobulin, mg/L        |     |    |              |                  |       |    |              |                  |
| ≥4                                | 43  | 37 | 35.1 (27.06) | 25.9 (0.0, 95.3) | 45    | 39 | 19.7 (20.98) | 14.0 (0.0, 73.0) |
| <4                                | 57  | 48 | 31.9 (24.04) | 30.4 (0.0, 93.0) | 57    | 48 | 16.5 (20.04) | 8.7 (0.0, 77.0)  |
| Rai stage                         |     |    |              |                  |       |    |              |                  |
| 0-2                               | 66  | 60 | 29.9 (23.97) | 23.0 (0.0, 79.2) | 62    | 51 | 14.8 (19.67) | 6.0 (0.0, 75.0)  |
| 3-4                               | 38  | 29 | 44.5 (28.42) | 41.0 (1.9, 95.3) | 42    | 37 | 22.9 (20.83) | 15.0 (0.0, 77.0) |

N = number of subjects in each subgroup. n=number of subjects with non-missing MRD value.

## B. Time assessment: 24 months

| Subgroups                         | Ibr |    |              |                  | Ibr+R |    |              |                  |
|-----------------------------------|-----|----|--------------|------------------|-------|----|--------------|------------------|
|                                   | N   | n  | Mean (SD)    | Median (Min-Max) | N     | n  | Mean (SD)    | Median (Min-Max) |
| All subjects                      | 104 | 75 | 19.3 (20.83) | 12.7 (0.0, 86.2) | 104   | 64 | 12.4 (17.33) | 4.8 (0.0, 84.8)  |
| Age group, yrs.                   |     |    |              |                  |       |    |              |                  |
| <65                               | 51  | 39 | 21.8 (22.72) | 14.1 (0.0, 85.5) | 48    | 33 | 15.4 (21.43) | 6.0 (0.0, 84.8)  |
| ≥65                               | 53  | 36 | 16.5 (18.48) | 10.8 (0.0, 86.2) | 56    | 31 | 9.3 (10.99)  | 4.7 (0.0, 50.0)  |
| Lines of prior treatment          |     |    |              |                  |       |    |              |                  |
| 0                                 | 15  | 10 | 20.6 (18.30) | 16.7 (0.0, 55.7) | 12    | 9  | 13.0 (16.48) | 8.3 (0.0, 50.0)  |
| 1-2                               | 68  | 49 | 17.0 (18.76) | 11.4 (0.0, 86.2) | 76    | 48 | 13.3 (18.59) | 4.8 (0.0, 84.8)  |
| ≥3                                | 21  | 16 | 25.3 (27.49) | 19.5 (0.0, 85.5) | 16    | 7  | 5.9 (5.34)   | 3.5 (0.0, 12.3)  |
| Del 17p/TP53 mutation (High risk) |     |    |              |                  |       |    |              |                  |
| Yes                               | 41  | 28 | 19.1 (19.97) | 12.3 (0.0, 85.5) | 36    | 23 | 17.2 (23.67) | 9.7 (0.0, 84.8)  |
| No                                | 35  | 24 | 16.8 (16.51) | 14.1 (0.0, 55.0) | 49    | 33 | 10.8 (12.88) | 4.7 (0.0, 57.2)  |
| Del 11q                           |     |    |              |                  |       |    |              |                  |
| Yes                               | 27  | 20 | 15.2 (15.92) | 8.0 (0.0, 55.0)  | 15    | 7  | 21.1 (24.48) | 4.2 (0.7, 57.2)  |
| No                                | 75  | 54 | 21.1 (22.34) | 13.9 (0.0, 86.2) | 86    | 56 | 11.5 (16.33) | 5.5 (0.0, 84.8)  |
| IGHV status                       |     |    |              |                  |       |    |              |                  |
| Mutated                           | 26  | 20 | 16.9 (17.49) | 12.1 (3.2, 79.4) | 22    | 14 | 10.1 (9.70)  | 9.2 (0.0, 31.3)  |
| Unmutated                         | 61  | 42 | 20.1 (21.33) | 13.9 (0.0, 85.5) | 62    | 42 | 14.6 (20.19) | 5.5 (0.0, 84.8)  |
| Beta-2 macroglobulin, mg/L        |     |    |              |                  |       |    |              |                  |
| ≥4                                | 43  | 31 | 19.9 (22.53) | 11.0 (0.0, 85.5) | 45    | 28 | 8.2 (9.01)   | 4.6 (0.0, 31.3)  |
| <4                                | 57  | 41 | 17.2 (17.60) | 13.7(0.0, 86.2)  | 57    | 35 | 15.8 (21.59) | 7.4 (0.0, 84.8)  |
| Rai stage                         |     |    |              |                  |       |    |              |                  |
| 0-2                               | 66  | 51 | 13.6 (14.53) | 10.0 (0.0, 55.7) | 62    | 34 | 14.2 (22.06) | 5.0 (0.0, 84.8)  |
| 3-4                               | 38  | 24 | 31.2 (26.78) | 24.1 (3.4, 86.2) | 42    | 30 | 10.4 (9.52)  | 4.8 (0.0, 31.3)  |

N = number of subjects in each subgroup. n=number of subjects with non-missing MRD value.

**Supplemental Table 12. Time to Normalization of Absolute Lymphocyte Count (ALC)**

**ITT Population**

|                                                      | Ibr<br>(N=104) | Ibr+R<br>(N=104) |
|------------------------------------------------------|----------------|------------------|
| Subjects with baseline ALC $\geq$ 4000/ $\mu$ L - N1 | 91             | 83               |
| Normalized to $<$ 4000/ $\mu$ L - n (%)              | 64 (70.3)      | 66 (79.5)        |
| Time to Normalization (weeks) [1]                    |                |                  |
| n                                                    | 64             | 66               |
| Median                                               | 48             | 24               |
| Min, Max                                             | (2, 192)       | (1, 144)         |

N = number of subjects in the specified treatment arm in the ITT population.

N1 = number of subjects with baseline ALC  $\geq$  4000/ $\mu$ L. % = n/N1.

Time from start of treatment to the first post-baseline ALC  $<$  4000/ $\mu$ L.

Note: Actual date of ALC sampling is not available, nominal visit time is used (e.g. If the first post-baseline ALC  $<$  4000/ $\mu$ L is at 3 months visit, then time to normalization is 12 weeks.

**Supplemental Table 13. Descriptive Statistics for ALC (Absolute Lymphocyte Count, K/ $\mu$ L)**

**ITT Population**

| Time assessment | Ibr<br>(N=104) |                      | Ibr+R<br>(N=104) |                      |
|-----------------|----------------|----------------------|------------------|----------------------|
|                 | Absolute Value | Change from Baseline | Absolute Value   | Change from Baseline |
| Baseline        |                |                      |                  |                      |
| n               | 104            |                      | 104              |                      |
| Mean (SD)       | 56.8 (60.54)   |                      | 46.5 (53.66)     |                      |
| Median          | 29.6           |                      | 29.9             |                      |
| Min, Max        | 1, 351         |                      | 0, 292           |                      |
| 1 week          |                |                      |                  |                      |
| n               | 104            | 104                  | 104              | 104                  |
| Mean (SD)       | 87.1 (90.50)   | 30.3 (51.17)         | 59.4 (63.26)     | 12.9 (35.46)         |
| Median          | 56.8           | 15.9                 | 39.1             | 4.6                  |
| Min, Max        | 1, 549         | -120, 370            | 1, 327           | -91, 145             |
| 2 weeks         |                |                      |                  |                      |
| n               | 104            | 104                  | 104              | 104                  |
| Mean (SD)       | 77.1 (80.15)   | 20.3 (50.38)         | 53.0 (60.12)     | 6.5 (40.27)          |
| Median          | 44.6           | 15.4                 | 33.7             | 3.4                  |
| Min, Max        | 1, 434         | -165, 277            | 0, 306           | -105, 185            |
| 3 weeks         |                |                      |                  |                      |
| n               | 102            | 102                  | 103              | 103                  |
| Mean (SD)       | 77.7 (77.07)   | 21.1 (50.67)         | 53.8 (67.01)     | 6.9 (51.91)          |
| Median          | 50.3           | 14.6                 | 30.4             | 2.6                  |
| Min, Max        | 0, 393         | -171, 233            | 0, 334           | -103, 256            |
| 1 month         |                |                      |                  |                      |
| n               | 103            | 103                  | 104              | 104                  |
| Mean (SD)       | 80.2 (81.44)   | 22.9 (57.01)         | 51.3 (64.13)     | 4.7 (54.97)          |
| Median          | 51.8           | 14.2                 | 32.1             | 0.3                  |
| Min, Max        | 1, 364         | -175, 197            | 0, 342           | -104, 297            |
| 2 months        |                |                      |                  |                      |
| n               | 103            | 103                  | 101              | 101                  |
| Mean (SD)       | 71.5 (73.43)   | 14.2 (56.46)         | 39.2 (56.40)     | -8.0 (51.56)         |
| Median          | 45.5           | 10.6                 | 15.5             | -0.7                 |
| Min, Max        | 1, 335         | -172, 180            | 0, 350           | -129, 247            |



**Supplemental Table 13. Cont.**

|           |              |               |              |               |  |
|-----------|--------------|---------------|--------------|---------------|--|
| 3 months  |              |               |              |               |  |
| n         | 101          | 101           | 98           | 98            |  |
| Mean (SD) | 56.0 (61.49) | -2.2 (52.14)  | 25.6 (36.79) | -22.1 (47.11) |  |
| Median    | 37.7         | 0.5           | 8.3          | -4.9          |  |
| Min, Max  | 0, 303       | -175, 112     | 0, 229       | -168, 126     |  |
| 4 months  |              |               |              |               |  |
| n         | 101          | 101           | 96           | 96            |  |
| Mean (SD) | 43.7 (50.96) | -14.6 (51.48) | 18.3 (26.81) | -30.3 (46.50) |  |
| Median    | 26.6         | -2.7          | 6.2          | -11.4         |  |
| Min, Max  | 1, 266       | -211, 111     | 0, 128       | -182, 53      |  |
| 6 months  |              |               |              |               |  |
| n         | 101          | 101           | 96           | 96            |  |
| Mean (SD) | 34.0 (43.04) | -24.4 (53.02) | 12.5 (17.92) | -36.0 (46.72) |  |
| Median    | 17.6         | -8.5          | 4.3          | -20.5         |  |
| Min, Max  | 0, 214       | -259, 105     | 0, 103       | -203, 42      |  |
| 9 months  |              |               |              |               |  |
| n         | 93           | 93            | 92           | 92            |  |
| Mean (SD) | 17.9 (24.05) | -40.6 (55.24) | 6.6 (9.20)   | -40.4 (46.92) |  |
| Median    | 8.6          | -20.4         | 2.9          | -25.2         |  |
| Min, Max  | 0, 158       | -311, 40      | 0, 53        | -240, 15      |  |
| 12 months |              |               |              |               |  |
| n         | 90           | 90            | 90           | 90            |  |
| Mean (SD) | 13.0 (20.92) | -47.1 (58.27) | 5.0 (6.48)   | -45.0 (53.54) |  |
| Median    | 5.3          | -31.1         | 2.2          | -26.7         |  |
| Min, Max  | 0, 127       | -342, 26      | 0, 34        | -267, 7       |  |
| 15 months |              |               |              |               |  |
| n         | 84           | 84            | 79           | 79            |  |
| Mean (SD) | 9.5 (13.84)  | -50.5 (59.49) | 4.2 (6.02)   | -44.2 (51.19) |  |
| Median    | 4.1          | -37.6         | 2.0          | -28.6         |  |
| Min, Max  | 0, 66        | -341, 53      | 0, 37        | -272, 5       |  |
| 18 months |              |               |              |               |  |
| n         | 79           | 79            | 77           | 77            |  |
| Mean (SD) | 7.4 (11.81)  | -50.2 (60.21) | 3.5 (4.27)   | -47.7 (57.46) |  |
| Median    | 4.1          | -31.0         | 1.9          | -26.0         |  |
| Min, Max  | 1, 75        | -341, 21      | 0, 22        | -272, 0       |  |
| 21 months |              |               |              |               |  |
| n         | 55           | 55            | 52           | 52            |  |
| Mean (SD) | 8.9 (18.53)  | -53.6 (65.77) | 4.8 (12.72)  | -49.6 (58.92) |  |
| Median    | 3.3          | -32.0         | 1.9          | -26.6         |  |
| Min, Max  | 1, 107       | -347, 21      | 0, 92        | -280, 33      |  |

**Supplemental Table 13. Cont.**

|           |             |               |            |               |
|-----------|-------------|---------------|------------|---------------|
| 24 months |             |               |            |               |
| n         | 75          | 75            | 65         | 65            |
| Mean (SD) | 5.7 (9.83)  | -53.1 (61.75) | 4.2 (9.11) | -49.3 (54.62) |
| Median    | 2.6         | -31.0         | 2.1        | -29.0         |
| Min, Max  | 0, 70       | -334, 16      | 0, 72      | -243, 13      |
| 30 months |             |               |            |               |
| n         | 67          | 67            | 57         | 57            |
| Mean (SD) | 4.5 (8.08)  | -53.1 (63.59) | 3.4 (4.77) | -50.0 (55.81) |
| Median    | 2.5         | -26.6         | 2.0        | -28.0         |
| Min, Max  | 1, 65       | -345, 4       | 1, 34      | -244, 1       |
| 36 months |             |               |            |               |
| n         | 51          | 51            | 45         | 45            |
| Mean (SD) | 7.9 (21.38) | -45.8 (57.46) | 3.0 (3.57) | -49.3 (55.37) |
| Median    | 2.4         | -18.8         | 1.8        | -32.7         |
| Min, Max  | 1, 120      | -202, 98      | 1, 20      | -248, 0       |
| 42 months |             |               |            |               |
| n         | 35          | 35            | 34         | 34            |
| Mean (SD) | 7.0 (16.89) | -50.9 (60.05) | 2.5 (2.96) | -42.9 (47.30) |
| Median    | 2.0         | -29.0         | 1.6        | -23.7         |
| Min, Max  | 1, 86       | -201, 39      | 0, 18      | -144, 1       |
| 48 months |             |               |            |               |
| n         | 22          | 22            | 17         | 17            |
| Mean (SD) | 8.1 (28.23) | -40.4 (50.42) | 2.7 (1.87) | -50.1 (48.98) |
| Median    | 1.9         | -16.4         | 2.0        | -34.2         |
| Min, Max  | 1, 134      | -180, 4       | 1, 8       | -126, 1       |

**Supplemental Table 14. Descriptive Statistics  $\beta$ 2 Macroglobulin (mg/L)**

**ITT Population**

| Time assessment | Ibr<br>(N=104) |                      | Ibr+R<br>(N=104) |                      |
|-----------------|----------------|----------------------|------------------|----------------------|
|                 | Absolute Value | Change from Baseline | Absolute Value   | Change from Baseline |
| Baseline        |                |                      |                  |                      |
| n               | 100            |                      | 102              |                      |
| Mean (SD)       | 4.1 (2.07)     |                      | 4.1 (1.93)       |                      |
| Median          | 3.7            |                      | 3.7              |                      |
| Min, Max        | 1, 13          |                      | 1, 12            |                      |
| 1 week          |                |                      |                  |                      |
| n               | 85             | 83                   | 89               | 88                   |
| Mean (SD)       | 3.1 (1.46)     | -1.1 (1.09)          | 3.0 (1.45)       | -1.1 (1.00)          |
| Median          | 2.8            | -0.9                 | 2.7              | -1.0                 |
| Min, Max        | 2, 11          | -5, 1                | 1, 10            | -6, 1                |
| 2 weeks         |                |                      |                  |                      |
| n               | 84             | 82                   | 87               | 87                   |
| Mean (SD)       | 3.0 (1.28)     | -1.2 (1.28)          | 2.9 (1.29)       | -1.2 (1.07)          |
| Median          | 2.7            | -1.0                 | 2.7              | -0.9                 |
| Min, Max        | 1, 9           | -5, 2                | 1, 9             | -6, 0                |
| 3 weeks         |                |                      |                  |                      |
| n               | 86             | 84                   | 88               | 87                   |
| Mean (SD)       | 2.8 (1.29)     | -1.3 (1.27)          | 2.8 (1.25)       | -1.4 (1.19)          |
| Median          | 2.4            | -1.1                 | 2.4              | -1.1                 |
| Min, Max        | 1, 9           | -6, 1                | 1, 9             | -7, 0                |
| 1 month         |                |                      |                  |                      |
| n               | 94             | 91                   | 90               | 89                   |
| Mean (SD)       | 2.7 (1.25)     | -1.4 (1.41)          | 2.8 (1.41)       | -1.3 (1.30)          |
| Median          | 2.4            | -1.1                 | 2.5              | -1.0                 |
| Min, Max        | 1, 9           | -7, 2                | 1, 11            | -7, 2                |
| 2 months        |                |                      |                  |                      |
| n               | 97             | 93                   | 97               | 95                   |
| Mean (SD)       | 2.6 (1.08)     | -1.3 (1.43)          | 2.7 (1.23)       | -1.4 (1.45)          |
| Median          | 2.3            | -1.1                 | 2.4              | -1.1                 |
| Min, Max        | 1, 7           | -6, 3                | 1, 9             | -7, 3                |

**Supplemental Table 14. Cont.**

|           |            |             |            |             |
|-----------|------------|-------------|------------|-------------|
| 3 months  |            |             |            |             |
| n         | 97         | 93          | 95         | 93          |
| Mean (SD) | 2.6 (0.91) | -1.5 (1.57) | 2.6 (0.99) | -1.5 (1.43) |
| Median    | 2.3        | -1.0        | 2.4        | -1.1        |
| Min, Max  | 1, 7       | -8, 1       | 1, 7       | -7, 1       |
| 4 months  |            |             |            |             |
| n         | 100        | 96          | 95         | 94          |
| Mean (SD) | 2.6 (0.94) | -1.6 (1.59) | 2.5 (0.91) | -1.6 (1.48) |
| Median    | 2.4        | -1.4        | 2.2        | -1.3        |
| Min, Max  | 1, 6       | -8, 2       | 1, 7       | -7, 1       |
| 6 months  |            |             |            |             |
| n         | 98         | 94          | 93         | 92          |
| Mean (SD) | 2.6 (1.07) | -1.5 (1.55) | 2.4 (0.89) | -1.7 (1.53) |
| Median    | 2.3        | -1.3        | 2.2        | -1.3        |
| Min, Max  | 1, 8       | -8, 1       | 1, 6       | -8, 1       |
| 9 months  |            |             |            |             |
| n         | 89         | 85          | 91         | 89          |
| Mean (SD) | 2.5 (0.99) | -1.5 (1.59) | 2.3 (0.83) | -1.7 (1.52) |
| Median    | 2.2        | -1.2        | 2.1        | -1.3        |
| Min, Max  | 1, 7       | -8, 1       | 1, 6       | -8, 0       |
| 12 months |            |             |            |             |
| n         | 86         | 82          | 84         | 84          |
| Mean (SD) | 2.4 (0.89) | -1.7 (1.60) | 2.3 (0.90) | -1.8 (1.64) |
| Median    | 2.2        | -1.4        | 2.2        | -1.5        |
| Min, Max  | 1, 6       | -9, 1       | 1, 7       | -10, 1      |
| 15 months |            |             |            |             |
| n         | 79         | 75          | 74         | 73          |
| Mean (SD) | 2.4 (0.91) | -1.7 (1.57) | 2.3 (1.00) | -1.7 (1.39) |
| Median    | 2.1        | -1.3        | 2.2        | -1.6        |
| Min, Max  | 1, 5       | -9, 0       | 1, 7       | -7, 1       |
| 18 months |            |             |            |             |
| n         | 77         | 74          | 74         | 73          |
| Mean (SD) | 2.3 (0.80) | -1.8 (1.68) | 2.3 (1.37) | -1.8 (1.95) |
| Median    | 2.2        | -1.5        | 2.1        | -1.5        |
| Min, Max  | 1, 5       | -9, 2       | 1, 12      | -10, 6      |
| 21 months |            |             |            |             |
| n         | 53         | 50          | 51         | 51          |
| Mean (SD) | 2.4 (0.80) | -1.7 (1.90) | 2.3 (0.85) | -1.9 (1.70) |
| Median    | 2.3        | -1.3        | 2.1        | -1.7        |
| Min, Max  | 1, 5       | -9, 0       | 1, 7       | -6, 5       |

**Supplemental Table 14. Cont.**

|           |            |             |            |             |
|-----------|------------|-------------|------------|-------------|
| 24 months |            |             |            |             |
| n         | 74         | 71          | 63         | 62          |
| Mean (SD) | 2.3 (0.79) | -1.9 (1.80) | 2.1 (0.62) | -2.0 (1.78) |
| Median    | 2.1        | -1.8        | 2.0        | -1.5        |
| Min, Max  | 1, 5       | -9, 1       | 1, 5       | -9, 1       |
| 30 months |            |             |            |             |
| n         | 64         | 62          | 55         | 54          |
| Mean (SD) | 2.4 (0.73) | -1.8 (1.81) | 2.2 (0.57) | -1.8 (1.43) |
| Median    | 2.2        | -1.4        | 2.1        | -1.5        |
| Min, Max  | 1, 4       | -10, 1      | 1, 4       | -6, -0      |
| 36 months |            |             |            |             |
| n         | 47         | 44          | 42         | 41          |
| Mean (SD) | 2.4 (0.81) | -1.9 (1.63) | 2.0 (0.48) | -1.9 (1.47) |
| Median    | 2.2        | -1.7        | 2.0        | -1.8        |
| Min, Max  | 1, 5       | -8, 0       | 1, 3       | -6, -0      |
| 42 months |            |             |            |             |
| n         | 31         | 30          | 31         | 31          |
| Mean (SD) | 2.6 (0.81) | -1.9 (2.39) | 2.4 (0.71) | -1.7 (1.63) |
| Median    | 2.3        | -1.5        | 2.2        | -1.4        |
| Min, Max  | 2, 5       | -10, 1      | 1, 4       | -6, 2       |
| 48 months |            |             |            |             |
| n         | 21         | 21          | 16         | 16          |
| Mean (SD) | 2.7 (0.68) | -1.7 (2.27) | 2.5 (0.71) | -1.6 (1.25) |
| Median    | 2.7        | -1.1        | 2.3        | -1.6        |
| Min, Max  | 2, 4       | -9, 0       | 1, 3       | -5, 0       |

---

**Supplemental Table 15. Descriptive Statistics for Igs (mg/dL)**

**ITT Population**

| Time assessment  | lbr<br>(N=104) |             |             | lbr+R<br>(N=104) |              |             |
|------------------|----------------|-------------|-------------|------------------|--------------|-------------|
|                  | IgG            | IgA         | IgM         | IgG              | IgA          | IgM         |
| <b>Baseline</b>  |                |             |             |                  |              |             |
| n                | 101            |             |             | 104              |              |             |
| Mean (SEM)       | 754.4 (56.4)   | 74 (6.4)    | 56.5 (11.5) | 652.3 (33.3)     | 91.7 (27.4)  | 55.3 (13)   |
| Median           | 653            | 60          | 30.5        | 600.5            | 44.5         | 22          |
| Min, Max         | 60, 4829       | 5, 333      | 11, 1051    | 105, 1769        | 3, 2836      | 11, 1019    |
| <b>3 months</b>  |                |             |             |                  |              |             |
| n                | 99             |             |             | 95               |              |             |
| Mean (SEM)       | 712 (42.3)     | 91.9 (7.9)  | 47 (8)      | 635.4 (30.6)     | 102.5 (23.9) | 55.3 (19.9) |
| Median           | 606            | 71          | 25.5        | 605              | 59           | 17          |
| Min, Max         | 56, 2860       | 7, 497      | 11, 741     | 130, 1486        | 3, 2232      | 11, 1710    |
| <b>6 months</b>  |                |             |             |                  |              |             |
| n                | 95             |             |             | 87               |              |             |
| Mean (SEM)       | 685.3 (42.6)   | 94.4 (9.6)  | 49.3 (8.2)  | 622.3 (31.2)     | 100.9 (24.6) | 59.8 (24.9) |
| Median           | 577            | 67          | 28          | 582              | 50           | 16          |
| Min, Max         | 58, 2791       | 5, 747      | 11, 702     | 146, 1406        | 3, 2104      | 11, 1970    |
| <b>12 months</b> |                |             |             |                  |              |             |
| n                | 88             |             |             | 86               |              |             |
| Mean (SEM)       | 635.4 (36)     | 89.1 (8.2)  | 44.9 (6.7)  | 600 (29.5)       | 103.2 (23.8) | 36.4 (9.1)  |
| Median           | 589.5          | 68          | 27.5        | 565              | 51.5         | 16.5        |
| Min, Max         | 53, 2380       | 7, 495      | 10, 492     | 147, 1224        | 3, 1951      | 10, 750     |
| <b>24 months</b> |                |             |             |                  |              |             |
| n                | 75             |             |             | 62               |              |             |
| Mean (SEM)       | 656.4 (38.3)   | 89.6 (8.5)  | 40 (6.5)    | 563.1 (30.4)     | 105.3 (28.6) | 25.8 (4.6)  |
| Median           | 599            | 77          | 24          | 575              | 45           | 15          |
| Min, Max         | 33, 2158       | 7, 379      | 10, 418     | 117, 1140        | 3, 1696      | 10, 260     |
| <b>36 months</b> |                |             |             |                  |              |             |
| n                | 21             |             |             | 19               |              |             |
| Mean (SEM)       | 600 (72.1)     | 77.5 (18.4) | 51.5 (28.6) | 431.5 (35.4)     | 66.1 (14.7)  | 18.4 (2.2)  |
| Median           | 627            | 33.5        | 13          | 439              | 50           | 13          |
| Min, Max         | 30, 1125       | 6, 309      | 11, 590     | 157, 673         | 3, 256       | 11, 44      |

**Supplemental Table 16. Descriptive Statistics for T cells (cells/ $\mu$ L)**

**ITT Population**

| Time assessment  | lbr<br>(N=104) |            |            | lbr+R<br>(N=104) |            |            |
|------------------|----------------|------------|------------|------------------|------------|------------|
|                  | CD3+           | CD4+       | CD8+       | CD3+             | CD4+       | CD8+       |
| <b>Baseline</b>  |                |            |            |                  |            |            |
| n                | 74             |            |            | 76               |            |            |
| Mean (SEM)       | 3469 (322)     | 1592 (141) | 1670 (183) | 3496 (473)       | 1539 (178) | 1502 (188) |
| Median           | 2437           | 1179       | 1034       | 2530             | 1088       | 880        |
| Min, Max         | 217, 12607     | 141, 5278  | 95, 7222   | 140, 26330       | 61, 9474   | 28, 9843   |
| <b>6 months</b>  |                |            |            |                  |            |            |
| n                | 63             |            |            | 57               |            |            |
| Mean (SEM)       | 2945 (364)     | 1324 (126) | 1524 (214) | 1910 (200)       | 918 (115)  | 987 (106)  |
| Median           | 2208           | 1022       | 868        | 1449             | 636        | 714        |
| Min, Max         | 117, 17467     | 159, 4747  | 146, 9234  | 137, 7727        | 91, 5118   | 40, 3626   |
| <b>12 months</b> |                |            |            |                  |            |            |
| n                | 48             |            |            | 44               |            |            |
| Mean (SEM)       | 1549 (155)     | 763 (66)   | 718 (106)  | 1629 (185)       | 799 (90)   | 808 (104)  |
| Median           | 1317           | 658        | 551        | 1266             | 581        | 587        |
| Min, Max         | 275, 5957      | 125, 3018  | 116, 4370  | 361, 6307        | 178, 2886  | 67, 3709   |
| <b>24 months</b> |                |            |            |                  |            |            |
| n                | 12             |            |            | 8                |            |            |
| Mean (SEM)       | 941 (136)      | 498 (73)   | 426 (74)   | 1793 (451)       | 900 (233)  | 893 (257)  |
| Median           | 890            | 482        | 399        | 1631             | 838        | 858        |
| Min, Max         | 149, 1876      | 86, 971    | 64, 981    | 284, 4560        | 165, 2267  | 109, 2406  |

**Supplemental Table 17. Grade 3 or higher Treatment Emergent Adverse Events (TEAE) by Preferred Term**

**Safety Population**

| MedDRA Preferred Term                                                     | Ibr<br>(N=104)    |                   |                 | Ibr+R<br>(N=104)  |                   |                 |
|---------------------------------------------------------------------------|-------------------|-------------------|-----------------|-------------------|-------------------|-----------------|
|                                                                           | Grade 3-5<br>n(%) | Grade 3+4<br>n(%) | Grade 5<br>n(%) | Grade 3-5<br>n(%) | Grade 3+4<br>n(%) | Grade 5<br>n(%) |
| Subjects with any TEAE                                                    | 69 ( 66.3)        | 67 ( 64.4)        | 2 ( 1.9)        | 71 ( 68.3)        | 68 ( 65.4)        | 3 ( 2.9)        |
| Hypertension                                                              | 32 ( 30.8)        | 32 ( 30.8)        | 0               | 33 ( 31.7)        | 33 ( 31.7)        | 0               |
| Neutrophil Count Decreased                                                | 10 ( 9.6)         | 10 ( 9.6)         | 0               | 14 ( 13.5)        | 14 ( 13.5)        | 0               |
| Atrial Fibrillation                                                       | 8 ( 7.7)          | 8 ( 7.7)          | 0               | 6 ( 5.8)          | 6 ( 5.8)          | 0               |
| Infections And Infestations                                               | 6 ( 5.8)          | 6 ( 5.8)          | 0               | 3 ( 2.9)          | 3 ( 2.9)          | 0               |
| Respiratory, Thoracic And<br>Mediastinal Disorders                        | 6 ( 5.8)          | 6 ( 5.8)          | 0               | 6 ( 5.8)          | 6 ( 5.8)          | 0               |
| Lung Infection                                                            | 5 ( 4.8)          | 5 ( 4.8)          | 0               | 5 ( 4.8)          | 4 ( 3.8)          | 1 ( 1.0)        |
| Platelet Count Decreased                                                  | 5 ( 4.8)          | 5 ( 4.8)          | 0               | 7 ( 6.7)          | 7 ( 6.7)          | 0               |
| Diarrhea                                                                  | 4 ( 3.8)          | 4 ( 3.8)          | 0               | 1 ( 1.0)          | 1 ( 1.0)          | 0               |
| Fatigue                                                                   | 4 ( 3.8)          | 4 ( 3.8)          | 0               | 0                 | 0                 | 0               |
| Gastrointestinal Disorders                                                | 4 ( 3.8)          | 4 ( 3.8)          | 0               | 2 ( 1.9)          | 2 ( 1.9)          | 0               |
| Cough                                                                     | 3 ( 2.9)          | 3 ( 2.9)          | 0               | 0                 | 0                 | 0               |
| Leukocytosis                                                              | 3 ( 2.9)          | 3 ( 2.9)          | 0               | 8 ( 7.7)          | 8 ( 7.7)          | 0               |
| Neoplasms Benign, Malignant<br>And Unspecified (Incl Cysts<br>And Polyps) | 3 ( 2.9)          | 3 ( 2.9)          | 0               | 4 ( 3.8)          | 4 ( 3.8)          | 0               |
| Upper Respiratory Infection                                               | 3 ( 2.9)          | 3 ( 2.9)          | 0               | 1 ( 1.0)          | 1 ( 1.0)          | 0               |
| Wound Infection                                                           | 3 ( 2.9)          | 3 ( 2.9)          | 0               | 2 ( 1.9)          | 2 ( 1.9)          | 0               |
| Abdominal Pain                                                            | 2 ( 1.9)          | 2 ( 1.9)          | 0               | 0                 | 0                 | 0               |
| Anemia                                                                    | 2 ( 1.9)          | 2 ( 1.9)          | 0               | 3 ( 2.9)          | 3 ( 2.9)          | 0               |
| Dyspnea                                                                   | 2 ( 1.9)          | 2 ( 1.9)          | 0               | 3 ( 2.9)          | 3 ( 2.9)          | 0               |
| Febrile Neutropenia                                                       | 2 ( 1.9)          | 2 ( 1.9)          | 0               | 6 ( 5.8)          | 6 ( 5.8)          | 0               |
| Headache                                                                  | 2 ( 1.9)          | 2 ( 1.9)          | 0               | 1 ( 1.0)          | 1 ( 1.0)          | 0               |
| Hyperglycemia                                                             | 2 ( 1.9)          | 2 ( 1.9)          | 0               | 1 ( 1.0)          | 1 ( 1.0)          | 0               |
| Treatment Related Secondary<br>Malignancy                                 | 2 ( 1.9)          | 2 ( 1.9)          | 0               | 2 ( 1.9)          | 2 ( 1.9)          | 0               |
| Urinary Tract Infection                                                   | 2 ( 1.9)          | 2 ( 1.9)          | 0               | 0                 | 0                 | 0               |
| Vascular Disorders                                                        | 2 ( 1.9)          | 2 ( 1.9)          | 0               | 2 ( 1.9)          | 1 ( 1.0)          | 1 ( 1.0)        |
| Appendicitis                                                              | 1 ( 1.0)          | 1 ( 1.0)          | 0               | 0                 | 0                 | 0               |
| Blood And Lymphatic System<br>Disorders                                   | 1 ( 1.0)          | 1 ( 1.0)          | 0               | 1 ( 1.0)          | 1 ( 1.0)          | 0               |
| Bronchial Infection                                                       | 1 ( 1.0)          | 1 ( 1.0)          | 0               | 0                 | 0                 | 0               |
| Cardiac Disorders                                                         | 1 ( 1.0)          | 1 ( 1.0)          | 0               | 3 ( 2.9)          | 3 ( 2.9)          | 0               |
| Chest Pain Cardiac                                                        | 1 ( 1.0)          | 1 ( 1.0)          | 0               | 0                 | 0                 | 0               |
| Death Nos                                                                 | 1 ( 1.0)          | 0                 | 1 ( 1.0)        | 0                 | 0                 | 0               |
| Depression                                                                | 1 ( 1.0)          | 1 ( 1.0)          | 0               | 1 ( 1.0)          | 1 ( 1.0)          | 0               |



**Supplemental Table 17. Cont.**

|                                        |          |          |          |          |          |          |
|----------------------------------------|----------|----------|----------|----------|----------|----------|
| Dizziness                              | 1 ( 1.0) | 1 ( 1.0) | 0        | 1 ( 1.0) | 1 ( 1.0) | 0        |
| Ejection Fraction Decreased            | 1 ( 1.0) | 1 ( 1.0) | 0        | 0        | 0        | 0        |
| Eye Disorders                          | 1 ( 1.0) | 1 ( 1.0) | 0        | 0        | 0        | 0        |
| Hematoma                               | 1 ( 1.0) | 1 ( 1.0) | 0        | 0        | 0        | 0        |
| Hypocalcemia                           | 1 ( 1.0) | 1 ( 1.0) | 0        | 0        | 0        | 0        |
| Insomnia                               | 1 ( 1.0) | 1 ( 1.0) | 0        | 0        | 0        | 0        |
| Nausea                                 | 1 ( 1.0) | 1 ( 1.0) | 0        | 2 ( 1.9) | 2 ( 1.9) | 0        |
| Neck Pain                              | 1 ( 1.0) | 1 ( 1.0) | 0        | 0        | 0        | 0        |
| Pain                                   | 1 ( 1.0) | 1 ( 1.0) | 0        | 0        | 0        | 0        |
| Pancreatitis                           | 1 ( 1.0) | 1 ( 1.0) | 0        | 0        | 0        | 0        |
| Postoperative Hemorrhage               | 1 ( 1.0) | 1 ( 1.0) | 0        | 0        | 0        | 0        |
| Rash Maculo Papular                    | 1 ( 1.0) | 1 ( 1.0) | 0        | 0        | 0        | 0        |
| Rectal Hemorrhage                      | 1 ( 1.0) | 1 ( 1.0) | 0        | 0        | 0        | 0        |
| Renal And Urinary Disorders            | 1 ( 1.0) | 1 ( 1.0) | 0        | 1 ( 1.0) | 1 ( 1.0) | 0        |
| Respiratory Failure                    | 1 ( 1.0) | 0        | 1 ( 1.0) | 1 ( 1.0) | 1 ( 1.0) | 0        |
| Skin And Subcutaneous Tissue Disorders | 1 ( 1.0) | 1 ( 1.0) | 0        | 1 ( 1.0) | 1 ( 1.0) | 0        |
| Skin Infection                         | 1 ( 1.0) | 1 ( 1.0) | 0        | 1 ( 1.0) | 1 ( 1.0) | 0        |
| Stroke                                 | 1 ( 1.0) | 1 ( 1.0) | 0        | 0        | 0        | 0        |
| Surgical And Medical Procedures        | 1 ( 1.0) | 1 ( 1.0) | 0        | 0        | 0        | 0        |
| Syncope                                | 1 ( 1.0) | 1 ( 1.0) | 0        | 0        | 0        | 0        |
| Upper Gastrointestinal Hemorrhage      | 1 ( 1.0) | 1 ( 1.0) | 0        | 0        | 0        | 0        |
| Vertigo                                | 1 ( 1.0) | 1 ( 1.0) | 0        | 0        | 0        | 0        |
| Back Pain                              | 0        | 0        | 0        | 1 ( 1.0) | 1 ( 1.0) | 0        |
| Bladder Infection                      | 0        | 0        | 0        | 1 ( 1.0) | 1 ( 1.0) | 0        |
| Bone Pain                              | 0        | 0        | 0        | 1 ( 1.0) | 1 ( 1.0) | 0        |
| Cataract                               | 0        | 0        | 0        | 1 ( 1.0) | 1 ( 1.0) | 0        |
| Chronic Kidney Disease                 | 0        | 0        | 0        | 1 ( 1.0) | 1 ( 1.0) | 0        |
| Enterocolitis Infectious               | 0        | 0        | 0        | 1 ( 1.0) | 1 ( 1.0) | 0        |
| Fever                                  | 0        | 0        | 0        | 1 ( 1.0) | 1 ( 1.0) | 0        |
| Hallucinations                         | 0        | 0        | 0        | 1 ( 1.0) | 1 ( 1.0) | 0        |
| Hypokalemia                            | 0        | 0        | 0        | 2 ( 1.9) | 2 ( 1.9) | 0        |
| Hyponatremia                           | 0        | 0        | 0        | 1 ( 1.0) | 1 ( 1.0) | 0        |
| Kidney Infection                       | 0        | 0        | 0        | 1 ( 1.0) | 1 ( 1.0) | 0        |
| Obstruction Gastric                    | 0        | 0        | 0        | 1 ( 1.0) | 0        | 1 ( 1.0) |
| Oral Pain                              | 0        | 0        | 0        | 1 ( 1.0) | 1 ( 1.0) | 0        |
| Otitis Media                           | 0        | 0        | 0        | 1 ( 1.0) | 1 ( 1.0) | 0        |
| Pericardial Effusion                   | 0        | 0        | 0        | 1 ( 1.0) | 1 ( 1.0) | 0        |
| Pleural Effusion                       | 0        | 0        | 0        | 1 ( 1.0) | 1 ( 1.0) | 0        |
| Pleuritic Pain                         | 0        | 0        | 0        | 1 ( 1.0) | 1 ( 1.0) | 0        |
| Rash Acneiform                         | 0        | 0        | 0        | 1 ( 1.0) | 1 ( 1.0) | 0        |
| Seizure                                | 0        | 0        | 0        | 1 ( 1.0) | 1 ( 1.0) | 0        |
| Sepsis                                 | 0        | 0        | 0        | 1 ( 1.0) | 1 ( 1.0) | 0        |
| Sinusitis                              | 0        | 0        | 0        | 2 ( 1.9) | 2 ( 1.9) | 0        |
| Vomiting                               | 0        | 0        | 0        | 1 ( 1.0) | 1 ( 1.0) | 0        |
| White Blood Cell Decreased             | 0        | 0        | 0        | 1 ( 1.0) | 1 ( 1.0) | 0        |

---

Subjects with multiple events for a given preferred term are counted once only using maximum severity for each preferred term.

Events are sorted by decreasing frequency of preferred term by Grade 3-5 column in the ibrutinib group.

TEAEs are defined as: (1) events with onset dates on or after the first dose of study drug, and within 30 days following the last dose of study drug; (2) events that are considered study drug-related regardless of the start date of the event; (3) events present at baseline that worsen in severity or are subsequently considered drug-related by the investigator.

**Supplemental Table 18. Treatment Emergent Adverse Events (TEAE) by Preferred Term and Maximum Severity**

**Safety Population**

| MedDRA Preferred Term                                               | Ibr<br>(N=104)    |                   |                 | Ibr+R<br>(N=104)  |                   |                 |
|---------------------------------------------------------------------|-------------------|-------------------|-----------------|-------------------|-------------------|-----------------|
|                                                                     | Any Grade<br>n(%) | Grade 3+4<br>n(%) | Grade 5<br>n(%) | Any Grade<br>n(%) | Grade 3+4<br>n(%) | Grade 5<br>n(%) |
| Subjects with any TEAE                                              | 104 (100.0)       | 67 ( 64.4)        | 2 ( 1.9)        | 104 (100.0)       | 68 ( 65.4)        | 3 ( 2.9)        |
| Hypertension                                                        | 50 ( 48.1)        | 32 ( 30.8)        | 0               | 45 ( 43.3)        | 33 ( 31.7)        | 0               |
| Upper Respiratory Infection                                         | 36 ( 34.6)        | 3 ( 2.9)          | 0               | 25 ( 24.0)        | 1 ( 1.0)          | 0               |
| Arthralgia                                                          | 34 ( 32.7)        | 0                 | 0               | 27 ( 26.0)        | 0                 | 0               |
| Skin And Subcutaneous Tissue Disorders                              | 33 ( 31.7)        | 1 ( 1.0)          | 0               | 31 ( 29.8)        | 1 ( 1.0)          | 0               |
| Diarrhea                                                            | 29 ( 27.9)        | 4 ( 3.8)          | 0               | 28 ( 26.9)        | 1 ( 1.0)          | 0               |
| Bruising                                                            | 26 ( 25.0)        | 0                 | 0               | 25 ( 24.0)        | 0                 | 0               |
| Fatigue                                                             | 23 ( 22.1)        | 4 ( 3.8)          | 0               | 13 ( 12.5)        | 0                 | 0               |
| Cough                                                               | 22 ( 21.2)        | 3 ( 2.9)          | 0               | 13 ( 12.5)        | 0                 | 0               |
| Headache                                                            | 19 ( 18.3)        | 2 ( 1.9)          | 0               | 16 ( 15.4)        | 1 ( 1.0)          | 0               |
| Skin Infection                                                      | 15 ( 14.4)        | 1 ( 1.0)          | 0               | 11 ( 10.6)        | 1 ( 1.0)          | 0               |
| Nausea                                                              | 14 ( 13.5)        | 1 ( 1.0)          | 0               | 8 ( 7.7)          | 2 ( 1.9)          | 0               |
| Atrial Fibrillation                                                 | 13 ( 12.5)        | 8 ( 7.7)          | 0               | 10 ( 9.6)         | 6 ( 5.8)          | 0               |
| Myalgia                                                             | 13 ( 12.5)        | 0                 | 0               | 16 ( 15.4)        | 0                 | 0               |
| Neoplasms Benign, Malignant And Unspecified (Incl Cysts And Polyps) | 13 ( 12.5)        | 3 ( 2.9)          | 0               | 14 ( 13.5)        | 4 ( 3.8)          | 0               |
| Sinusitis                                                           | 13 ( 12.5)        | 0                 | 0               | 12 ( 11.5)        | 2 ( 1.9)          | 0               |
| Infections And Infestations                                         | 12 ( 11.5)        | 6 ( 5.8)          | 0               | 10 ( 9.6)         | 3 ( 2.9)          | 0               |
| Gastrointestinal Disorders                                          | 11 ( 10.6)        | 4 ( 3.8)          | 0               | 6 ( 5.8)          | 2 ( 1.9)          | 0               |
| Lung Infection                                                      | 11 ( 10.6)        | 5 ( 4.8)          | 0               | 7 ( 6.7)          | 4 ( 3.8)          | 1 ( 1.0)        |
| Dizziness                                                           | 10 ( 9.6)         | 1 ( 1.0)          | 0               | 6 ( 5.8)          | 1 ( 1.0)          | 0               |
| Edema Limbs                                                         | 10 ( 9.6)         | 0                 | 0               | 12 ( 11.5)        | 0                 | 0               |
| Neutrophil Count Decreased                                          | 10 ( 9.6)         | 10 ( 9.6)         | 0               | 14 ( 13.5)        | 14 ( 13.5)        | 0               |
| Musculoskeletal And Connective Tissue Disorder                      | 9 ( 8.7)          | 0                 | 0               | 7 ( 6.7)          | 0                 | 0               |
| Abdominal Pain                                                      | 8 ( 7.7)          | 2 ( 1.9)          | 0               | 5 ( 4.8)          | 0                 | 0               |
| Insomnia                                                            | 8 ( 7.7)          | 1 ( 1.0)          | 0               | 2 ( 1.9)          | 0                 | 0               |
| Pain In Extremity                                                   | 8 ( 7.7)          | 0                 | 0               | 12 ( 11.5)        | 0                 | 0               |
| Respiratory, Thoracic And Mediastinal Disorders                     | 8 ( 7.7)          | 6 ( 5.8)          | 0               | 9 ( 8.7)          | 6 ( 5.8)          | 0               |
| Back Pain                                                           | 7 ( 6.7)          | 0                 | 0               | 12 ( 11.5)        | 1 ( 1.0)          | 0               |
| Fall                                                                | 7 ( 6.7)          | 0                 | 0               | 1 ( 1.0)          | 0                 | 0               |
| Palpitations                                                        | 7 ( 6.7)          | 0                 | 0               | 8 ( 7.7)          | 0                 | 0               |
| Urinary Tract Infection                                             | 7 ( 6.7)          | 2 ( 1.9)          | 0               | 8 ( 7.7)          | 0                 | 0               |
| Cardiac Disorders                                                   | 6 ( 5.8)          | 1 ( 1.0)          | 0               | 5 ( 4.8)          | 3 ( 2.9)          | 0               |

**Supplemental Table 18. Cont.**

|                                 |          |          |   |          |          |   |
|---------------------------------|----------|----------|---|----------|----------|---|
| Hyperhidrosis                   | 6 ( 5.8) | 0        | 0 | 1 ( 1.0) | 0        | 0 |
| Platelet Count Decreased        | 6 ( 5.8) | 5 ( 4.8) | 0 | 7 ( 6.7) | 7 ( 6.7) | 0 |
| Rash Maculo Papular             | 6 ( 5.8) | 1 ( 1.0) | 0 | 6 ( 5.8) | 0        | 0 |
| Sinus Bradycardia               | 6 ( 5.8) | 0        | 0 | 8 ( 7.7) | 0        | 0 |
| Vomiting                        | 6 ( 5.8) | 0        | 0 | 4 ( 3.8) | 1 ( 1.0) | 0 |
| Bronchial Infection             | 5 ( 4.8) | 1 ( 1.0) | 0 | 4 ( 3.8) | 0        | 0 |
| Dyspnea                         | 5 ( 4.8) | 2 ( 1.9) | 0 | 4 ( 3.8) | 3 ( 2.9) | 0 |
| Otitis Media                    | 5 ( 4.8) | 0        | 0 | 1 ( 1.0) | 1 ( 1.0) | 0 |
| Paresthesia                     | 5 ( 4.8) | 0        | 0 | 4 ( 3.8) | 0        | 0 |
| Surgical And Medical Procedures | 5 ( 4.8) | 1 ( 1.0) | 0 | 0        | 0        | 0 |
| Arthritis                       | 4 ( 3.8) | 0        | 0 | 1 ( 1.0) | 0        | 0 |
| Fever                           | 4 ( 3.8) | 0        | 0 | 9 ( 8.7) | 1 ( 1.0) | 0 |
| Gastroesophageal Reflux Disease | 4 ( 3.8) | 0        | 0 | 7 ( 6.7) | 0        | 0 |
| Hematuria                       | 4 ( 3.8) | 0        | 0 | 2 ( 1.9) | 0        | 0 |
| Hyperglycemia                   | 4 ( 3.8) | 2 ( 1.9) | 0 | 4 ( 3.8) | 1 ( 1.0) | 0 |
| Pain                            | 4 ( 3.8) | 1 ( 1.0) | 0 | 3 ( 2.9) | 0        | 0 |
| Postnasal Drip                  | 4 ( 3.8) | 0        | 0 | 1 ( 1.0) | 0        | 0 |
| Sore Throat                     | 4 ( 3.8) | 0        | 0 | 6 ( 5.8) | 0        | 0 |
| Allergic Rhinitis               | 3 ( 2.9) | 0        | 0 | 4 ( 3.8) | 0        | 0 |
| Anxiety                         | 3 ( 2.9) | 0        | 0 | 5 ( 4.8) | 0        | 0 |
| Bloating                        | 3 ( 2.9) | 0        | 0 | 1 ( 1.0) | 0        | 0 |
| Chest Pain Cardiac              | 3 ( 2.9) | 1 ( 1.0) | 0 | 3 ( 2.9) | 0        | 0 |
| Depression                      | 3 ( 2.9) | 1 ( 1.0) | 0 | 2 ( 1.9) | 1 ( 1.0) | 0 |
| Ear Pain                        | 3 ( 2.9) | 0        | 0 | 0        | 0        | 0 |
| Enterocolitis Infectious        | 3 ( 2.9) | 0        | 0 | 1 ( 1.0) | 1 ( 1.0) | 0 |
| Eye Disorders                   | 3 ( 2.9) | 1 ( 1.0) | 0 | 4 ( 3.8) | 0        | 0 |
| Hemorrhoids                     | 3 ( 2.9) | 0        | 0 | 0        | 0        | 0 |
| Leukocytosis                    | 3 ( 2.9) | 3 ( 2.9) | 0 | 8 ( 7.7) | 8 ( 7.7) | 0 |
| Malaise                         | 3 ( 2.9) | 0        | 0 | 1 ( 1.0) | 0        | 0 |
| Mucositis Oral                  | 3 ( 2.9) | 0        | 0 | 8 ( 7.7) | 0        | 0 |
| Neck Pain                       | 3 ( 2.9) | 1 ( 1.0) | 0 | 2 ( 1.9) | 0        | 0 |
| Peripheral Sensory Neuropathy   | 3 ( 2.9) | 0        | 0 | 3 ( 2.9) | 0        | 0 |
| Pruritus                        | 3 ( 2.9) | 0        | 0 | 1 ( 1.0) | 0        | 0 |
| Rectal Hemorrhage               | 3 ( 2.9) | 1 ( 1.0) | 0 | 0        | 0        | 0 |
| Renal And Urinary Disorders     | 3 ( 2.9) | 1 ( 1.0) | 0 | 2 ( 1.9) | 1 ( 1.0) | 0 |
| Sinus Tachycardia               | 3 ( 2.9) | 0        | 0 | 3 ( 2.9) | 0        | 0 |
| Tinnitus                        | 3 ( 2.9) | 0        | 0 | 2 ( 1.9) | 0        | 0 |
| Vertigo                         | 3 ( 2.9) | 1 ( 1.0) | 0 | 2 ( 1.9) | 0        | 0 |
| Wound Infection                 | 3 ( 2.9) | 3 ( 2.9) | 0 | 2 ( 1.9) | 2 ( 1.9) | 0 |
| Abdominal Distension            | 2 ( 1.9) | 0        | 0 | 0        | 0        | 0 |
| Alopecia                        | 2 ( 1.9) | 0        | 0 | 0        | 0        | 0 |
| Anemia                          | 2 ( 1.9) | 2 ( 1.9) | 0 | 3 ( 2.9) | 3 ( 2.9) | 0 |
| Constipation                    | 2 ( 1.9) | 0        | 0 | 0        | 0        | 0 |
| Dysesthesia                     | 2 ( 1.9) | 0        | 0 | 1 ( 1.0) | 0        | 0 |
| Epistaxis                       | 2 ( 1.9) | 0        | 0 | 1 ( 1.0) | 0        | 0 |
| Esophagitis                     | 2 ( 1.9) | 0        | 0 | 1 ( 1.0) | 0        | 0 |

**Supplemental Table 18. Cont.**

|                                          |          |          |          |          |          |          |
|------------------------------------------|----------|----------|----------|----------|----------|----------|
| Eye Infection                            | 2 ( 1.9) | 0        | 0        | 1 ( 1.0) | 0        | 0        |
| Febrile Neutropenia                      | 2 ( 1.9) | 2 ( 1.9) | 0        | 6 ( 5.8) | 6 ( 5.8) | 0        |
| Flank Pain                               | 2 ( 1.9) | 0        | 0        | 0        | 0        | 0        |
| Fracture                                 | 2 ( 1.9) | 0        | 0        | 2 ( 1.9) | 0        | 0        |
| Gastrointestinal Pain                    | 2 ( 1.9) | 0        | 0        | 1 ( 1.0) | 0        | 0        |
| Hematoma                                 | 2 ( 1.9) | 1 ( 1.0) | 0        | 0        | 0        | 0        |
| Lip Infection                            | 2 ( 1.9) | 0        | 0        | 0        | 0        | 0        |
| Muscle Weakness Lower Limb               | 2 ( 1.9) | 0        | 0        | 2 ( 1.9) | 0        | 0        |
| Nasal Congestion                         | 2 ( 1.9) | 0        | 0        | 2 ( 1.9) | 0        | 0        |
| Osteoporosis                             | 2 ( 1.9) | 0        | 0        | 1 ( 1.0) | 0        | 0        |
| Paronychia                               | 2 ( 1.9) | 0        | 0        | 2 ( 1.9) | 0        | 0        |
| Periodontal Disease                      | 2 ( 1.9) | 0        | 0        | 0        | 0        | 0        |
| Rash Acneiform                           | 2 ( 1.9) | 0        | 0        | 4 ( 3.8) | 1 ( 1.0) | 0        |
| Reproductive System And Breast Disorders | 2 ( 1.9) | 0        | 0        | 3 ( 2.9) | 0        | 0        |
| Skin Ulceration                          | 2 ( 1.9) | 0        | 0        | 0        | 0        | 0        |
| Stroke                                   | 2 ( 1.9) | 1 ( 1.0) | 0        | 0        | 0        | 0        |
| Thromboembolic Event                     | 2 ( 1.9) | 0        | 0        | 0        | 0        | 0        |
| Treatment Related Secondary Malignancy   | 2 ( 1.9) | 2 ( 1.9) | 0        | 2 ( 1.9) | 2 ( 1.9) | 0        |
| Urinary Frequency                        | 2 ( 1.9) | 0        | 0        | 1 ( 1.0) | 0        | 0        |
| Vascular Disorders                       | 2 ( 1.9) | 2 ( 1.9) | 0        | 2 ( 1.9) | 1 ( 1.0) | 1 ( 1.0) |
| Weight Gain                              | 2 ( 1.9) | 0        | 0        | 1 ( 1.0) | 0        | 0        |
| Weight Loss                              | 2 ( 1.9) | 0        | 0        | 0        | 0        | 0        |
| Wheezing                                 | 2 ( 1.9) | 0        | 0        | 0        | 0        | 0        |
| Ankle Fracture                           | 1 ( 1.0) | 0        | 0        | 0        | 0        | 0        |
| Anorexia                                 | 1 ( 1.0) | 0        | 0        | 0        | 0        | 0        |
| Appendicitis                             | 1 ( 1.0) | 1 ( 1.0) | 0        | 0        | 0        | 0        |
| Ascites                                  | 1 ( 1.0) | 0        | 0        | 0        | 0        | 0        |
| Blood And Lymphatic System Disorders     | 1 ( 1.0) | 1 ( 1.0) | 0        | 1 ( 1.0) | 1 ( 1.0) | 0        |
| Bone Pain                                | 1 ( 1.0) | 0        | 0        | 1 ( 1.0) | 1 ( 1.0) | 0        |
| Chest Pain Cardiac                       | 1 ( 1.0) | 1 ( 1.0) | 0        | 0        | 0        | 0        |
| Chills                                   | 1 ( 1.0) | 0        | 0        | 4 ( 3.8) | 0        | 0        |
| Creatinine Increased                     | 1 ( 1.0) | 0        | 0        | 1 ( 1.0) | 0        | 0        |
| Death Nos                                | 1 ( 1.0) | 0        | 1 ( 1.0) | 0        | 0        | 0        |
| Dehydration                              | 1 ( 1.0) | 0        | 0        | 0        | 0        | 0        |
| Dry Mouth                                | 1 ( 1.0) | 0        | 0        | 1 ( 1.0) | 0        | 0        |
| Dysgeusia                                | 1 ( 1.0) | 0        | 0        | 1 ( 1.0) | 0        | 0        |
| Dyspepsia                                | 1 ( 1.0) | 0        | 0        | 5 ( 4.8) | 0        | 0        |
| Dysphagia                                | 1 ( 1.0) | 0        | 0        | 1 ( 1.0) | 0        | 0        |
| Ear And Labyrinth Disorders              | 1 ( 1.0) | 0        | 0        | 2 ( 1.9) | 0        | 0        |
| Ejection Fraction Decreased              | 1 ( 1.0) | 1 ( 1.0) | 0        | 0        | 0        | 0        |
| Erythema Multiforme                      | 1 ( 1.0) | 0        | 0        | 0        | 0        | 0        |
| Esophageal Pain                          | 1 ( 1.0) | 0        | 0        | 1 ( 1.0) | 0        | 0        |
| Flu Like Symptoms                        | 1 ( 1.0) | 0        | 0        | 1 ( 1.0) | 0        | 0        |
| Gastritis                                | 1 ( 1.0) | 0        | 0        | 0        | 0        | 0        |
| Hearing Impaired                         | 1 ( 1.0) | 0        | 0        | 1 ( 1.0) | 0        | 0        |

**Supplemental Table 18. Cont.**

|                                                   |          |          |          |          |          |   |
|---------------------------------------------------|----------|----------|----------|----------|----------|---|
| Hoarseness                                        | 1 ( 1.0) | 0        | 0        | 1 ( 1.0) | 0        | 0 |
| Hypocalcemia                                      | 1 ( 1.0) | 1 ( 1.0) | 0        | 0        | 0        | 0 |
| Hypoglycemia                                      | 1 ( 1.0) | 0        | 0        | 0        | 0        | 0 |
| Hypohidrosis                                      | 1 ( 1.0) | 0        | 0        | 0        | 0        | 0 |
| Injury, Poisoning And<br>Procedural Complications | 1 ( 1.0) | 0        | 0        | 0        | 0        | 0 |
| Investigations                                    | 1 ( 1.0) | 0        | 0        | 0        | 0        | 0 |
| Irritability                                      | 1 ( 1.0) | 0        | 0        | 0        | 0        | 0 |
| Joint Range Of Motion<br>Decreased                | 1 ( 1.0) | 0        | 0        | 0        | 0        | 0 |
| Keratitis                                         | 1 ( 1.0) | 0        | 0        | 0        | 0        | 0 |
| Laryngospasm                                      | 1 ( 1.0) | 0        | 0        | 0        | 0        | 0 |
| Lethargy                                          | 1 ( 1.0) | 0        | 0        | 0        | 0        | 0 |
| Localized Edema                                   | 1 ( 1.0) | 0        | 0        | 1 ( 1.0) | 0        | 0 |
| Lower Gastrointestinal<br>Hemorrhage              | 1 ( 1.0) | 0        | 0        | 0        | 0        | 0 |
| Metabolism And Nutrition<br>Disorders             | 1 ( 1.0) | 0        | 0        | 0        | 0        | 0 |
| Nail Infection                                    | 1 ( 1.0) | 0        | 0        | 2 ( 1.9) | 0        | 0 |
| Nail Loss                                         | 1 ( 1.0) | 0        | 0        | 1 ( 1.0) | 0        | 0 |
| Non Cardiac Chest Pain                            | 1 ( 1.0) | 0        | 0        | 2 ( 1.9) | 0        | 0 |
| Oral Pain                                         | 1 ( 1.0) | 0        | 0        | 3 ( 2.9) | 1 ( 1.0) | 0 |
| Pain Of Skin                                      | 1 ( 1.0) | 0        | 0        | 0        | 0        | 0 |
| Pancreatitis                                      | 1 ( 1.0) | 1 ( 1.0) | 0        | 0        | 0        | 0 |
| Penile Infection                                  | 1 ( 1.0) | 0        | 0        | 0        | 0        | 0 |
| Pharyngitis                                       | 1 ( 1.0) | 0        | 0        | 0        | 0        | 0 |
| Photosensitivity                                  | 1 ( 1.0) | 0        | 0        | 0        | 0        | 0 |
| Pleural Effusion                                  | 1 ( 1.0) | 0        | 0        | 1 ( 1.0) | 1 ( 1.0) | 0 |
| Postoperative Hemorrhage                          | 1 ( 1.0) | 1 ( 1.0) | 0        | 1 ( 1.0) | 0        | 0 |
| Productive Cough                                  | 1 ( 1.0) | 0        | 0        | 5 ( 4.8) | 0        | 0 |
| Prostate Infection                                | 1 ( 1.0) | 0        | 0        | 0        | 0        | 0 |
| Prostatic Pain                                    | 1 ( 1.0) | 0        | 0        | 0        | 0        | 0 |
| Purpura                                           | 1 ( 1.0) | 0        | 0        | 0        | 0        | 0 |
| Radiculitis                                       | 1 ( 1.0) | 0        | 0        | 0        | 0        | 0 |
| Respiratory Failure                               | 1 ( 1.0) | 0        | 1 ( 1.0) | 1 ( 1.0) | 1 ( 1.0) | 0 |
| Sleep Apnea                                       | 1 ( 1.0) | 0        | 0        | 2 ( 1.9) | 0        | 0 |
| Sneezing                                          | 1 ( 1.0) | 0        | 0        | 0        | 0        | 0 |
| Syncope                                           | 1 ( 1.0) | 1 ( 1.0) | 0        | 0        | 0        | 0 |
| Toothache                                         | 1 ( 1.0) | 0        | 0        | 1 ( 1.0) | 0        | 0 |
| Upper Gastrointestinal<br>Hemorrhage              | 1 ( 1.0) | 1 ( 1.0) | 0        | 0        | 0        | 0 |
| Urinary Retention                                 | 1 ( 1.0) | 0        | 0        | 2 ( 1.9) | 0        | 0 |
| Urinary Tract Pain                                | 1 ( 1.0) | 0        | 0        | 0        | 0        | 0 |
| Urine Discoloration                               | 1 ( 1.0) | 0        | 0        | 0        | 0        | 0 |
| Urticaria                                         | 1 ( 1.0) | 0        | 0        | 0        | 0        | 0 |
| Allergic Reaction                                 | 0        | 0        | 0        | 1 ( 1.0) | 0        | 0 |
| Aortic Valve Disease                              | 0        | 0        | 0        | 1 ( 1.0) | 0        | 0 |
| Bladder Infection                                 | 0        | 0        | 0        | 1 ( 1.0) | 1 ( 1.0) | 0 |

**Supplemental Table 18. Cont.**

|                                                      |   |   |   |          |          |          |
|------------------------------------------------------|---|---|---|----------|----------|----------|
| Blurred Vision                                       | 0 | 0 | 0 | 4 ( 3.8) | 0        | 0        |
| Cataract                                             | 0 | 0 | 0 | 1 ( 1.0) | 1 ( 1.0) | 0        |
| Cheilitis                                            | 0 | 0 | 0 | 1 ( 1.0) | 0        | 0        |
| Chest Wall Pain                                      | 0 | 0 | 0 | 3 ( 2.9) | 0        | 0        |
| Chronic Kidney Disease                               | 0 | 0 | 0 | 1 ( 1.0) | 1 ( 1.0) | 0        |
| Confusion                                            | 0 | 0 | 0 | 1 ( 1.0) | 0        | 0        |
| Conjunctivitis                                       | 0 | 0 | 0 | 1 ( 1.0) | 0        | 0        |
| Dry Skin                                             | 0 | 0 | 0 | 3 ( 2.9) | 0        | 0        |
| Edema Face                                           | 0 | 0 | 0 | 1 ( 1.0) | 0        | 0        |
| Erectile Dysfunction                                 | 0 | 0 | 0 | 1 ( 1.0) | 0        | 0        |
| Flatulence                                           | 0 | 0 | 0 | 2 ( 1.9) | 0        | 0        |
| Flushing                                             | 0 | 0 | 0 | 1 ( 1.0) | 0        | 0        |
| General Disorders And Administration Site Conditions | 0 | 0 | 0 | 1 ( 1.0) | 0        | 0        |
| Generalized Muscle Weakness                          | 0 | 0 | 0 | 1 ( 1.0) | 0        | 0        |
| Gingival Pain                                        | 0 | 0 | 0 | 2 ( 1.9) | 0        | 0        |
| Gum Infection                                        | 0 | 0 | 0 | 1 ( 1.0) | 0        | 0        |
| Hallucinations                                       | 0 | 0 | 0 | 1 ( 1.0) | 1 ( 1.0) | 0        |
| Hypokalemia                                          | 0 | 0 | 0 | 2 ( 1.9) | 2 ( 1.9) | 0        |
| Hyponatremia                                         | 0 | 0 | 0 | 1 ( 1.0) | 1 ( 1.0) | 0        |
| Hypothyroidism                                       | 0 | 0 | 0 | 2 ( 1.9) | 0        | 0        |
| Infusion Related Reaction                            | 0 | 0 | 0 | 5 ( 4.8) | 0        | 0        |
| Intracranial Hemorrhage                              | 0 | 0 | 0 | 1 ( 1.0) | 0        | 0        |
| Joint Infection                                      | 0 | 0 | 0 | 1 ( 1.0) | 0        | 0        |
| Kidney Infection                                     | 0 | 0 | 0 | 1 ( 1.0) | 1 ( 1.0) | 0        |
| Laryngeal Hemorrhage                                 | 0 | 0 | 0 | 1 ( 1.0) | 0        | 0        |
| Memory Impairment                                    | 0 | 0 | 0 | 2 ( 1.9) | 0        | 0        |
| Mucosal Infection                                    | 0 | 0 | 0 | 2 ( 1.9) | 0        | 0        |
| Nail Discoloration                                   | 0 | 0 | 0 | 2 ( 1.9) | 0        | 0        |
| Nervous System Disorders                             | 0 | 0 | 0 | 1 ( 1.0) | 0        | 0        |
| Obstruction Gastric                                  | 0 | 0 | 0 | 1 ( 1.0) | 0        | 1 ( 1.0) |
| Papulopustular Rash                                  | 0 | 0 | 0 | 3 ( 2.9) | 0        | 0        |
| Pericardial Effusion                                 | 0 | 0 | 0 | 1 ( 1.0) | 1 ( 1.0) | 0        |
| Pericarditis                                         | 0 | 0 | 0 | 1 ( 1.0) | 0        | 0        |
| Periorbital Edema                                    | 0 | 0 | 0 | 1 ( 1.0) | 0        | 0        |
| Pleuritic Pain                                       | 0 | 0 | 0 | 1 ( 1.0) | 1 ( 1.0) | 0        |
| Rash Pustular                                        | 0 | 0 | 0 | 3 ( 2.9) | 0        | 0        |
| Restlessness                                         | 0 | 0 | 0 | 1 ( 1.0) | 0        | 0        |
| Retinopathy                                          | 0 | 0 | 0 | 2 ( 1.9) | 0        | 0        |
| Seizure                                              | 0 | 0 | 0 | 1 ( 1.0) | 1 ( 1.0) | 0        |
| Sepsis                                               | 0 | 0 | 0 | 1 ( 1.0) | 1 ( 1.0) | 0        |
| Sinus Disorder                                       | 0 | 0 | 0 | 2 ( 1.9) | 0        | 0        |
| Skin Hyperpigmentation                               | 0 | 0 | 0 | 1 ( 1.0) | 0        | 0        |
| Stomach Pain                                         | 0 | 0 | 0 | 2 ( 1.9) | 0        | 0        |
| Supraventricular Tachycardia                         | 0 | 0 | 0 | 1 ( 1.0) | 0        | 0        |
| Urinary Tract Obstruction                            | 0 | 0 | 0 | 1 ( 1.0) | 0        | 0        |
| Urinary Urgency                                      | 0 | 0 | 0 | 1 ( 1.0) | 0        | 0        |

**Supplemental Table 18. Cont.**

|                            |   |   |   |          |          |   |
|----------------------------|---|---|---|----------|----------|---|
| Uveitis                    | 0 | 0 | 0 | 1 ( 1.0) | 0        | 0 |
| Ventricular Arrhythmia     | 0 | 0 | 0 | 1 ( 1.0) | 0        | 0 |
| Watering Eyes              | 0 | 0 | 0 | 1 ( 1.0) | 0        | 0 |
| White Blood Cell Decreased | 0 | 0 | 0 | 1 ( 1.0) | 1 ( 1.0) | 0 |

---

Subjects with multiple events for a given preferred term are counted once only using maximum severity for each preferred term.

Events are sorted by decreasing frequency of preferred term by Any Grade column in the ibrutinib group.

TEAEs are defined as: (1) events with onset dates on or after the first dose of study drug, and within 30 days following the last dose of study drug; (2) events that are considered study drug-related regardless of the start date of the event; (3) events present at baseline that worsen in severity or are subsequently considered drug-related by the investigator.



**Supplemental Table 19. Annualized Discontinuation Rate**

|                                  | Ibr (N = 104) |                          |      | Ibr+R (N = 104) |                          |      |
|----------------------------------|---------------|--------------------------|------|-----------------|--------------------------|------|
|                                  | n             | Patient-years<br>at Risk | ADR  | n               | Patient-years<br>at Risk | ADR  |
| Overall                          | 33            | 243.9                    | 13.5 | 37              | 228.2                    | 16.2 |
| Within the 1st year of treatment | 15            | 95.42                    | 15.7 | 20              | 93.87                    | 21.3 |
| Within the 2nd year of treatment | 7             | 76.70                    | 9.1  | 12              | 70.36                    | 17.1 |
| Within the 3rd year of treatment | 6             | 52.52                    | 11.4 | 3               | 45.73                    | 6.6  |

N = number of subjects randomized in specified treatment group. n = number of subjects who discontinued treatment.  
 Patient-years at risk is the sum of treatment duration in year for all subjects in the specified treatment group.  
 ADR =  $100 * n / \text{Patient-years at risk}$ .

**Supplemental Table 20. Event Free Survival (EFS) Analysis Results Adjusting for Stratification Factors**

| Event Free Survival (Months)           | Ibr<br>(N=104)    | Ibr+R<br>(N=104)  | Comparison/Difference<br>Ibr vs. Ibr+R |
|----------------------------------------|-------------------|-------------------|----------------------------------------|
| Events - n (%)                         | 15 (14.4)         | 13 (12.5)         |                                        |
| Disease Progression                    | 10                | 5                 |                                        |
| Death                                  | 5                 | 8                 |                                        |
| Censored - n (%)                       | 89 (85.6)         | 91 (87.5)         |                                        |
| Median (95% CI) [1]                    | NE (NE, NE)       | NE (NE, NE)       |                                        |
| Min, Max                               | 2.99+, 46.75+     | 2.92, 47.80+      |                                        |
| P value [2]                            |                   |                   | 0.9115                                 |
| Hazard Ratio (95% CI) [3]              |                   |                   | 1.043 (0.494, 2.203)                   |
| EFS at landmark times - % (95% CI) [1] |                   |                   |                                        |
| 6 months                               | 99.0 (93.3, 99.9) | 98.1 (92.5, 99.5) | 1.0 (-2.3, 4.2)                        |
| 12 months                              | 97.0 (91.1, 99.0) | 98.1 (92.5, 99.5) | -1.0 (-5.2, 3.2)                       |
| 15 months                              | 95.0 (88.4, 97.9) | 95.0 (88.4, 97.9) | 0.0 (-6.0, 6.1)                        |
| 18 months                              | 95.0 (88.4, 97.9) | 95.0 (88.4, 97.9) | 0.0 (-6.0, 6.1)                        |
| 24 months                              | 95.0 (88.4, 97.9) | 92.5 (84.9, 96.4) | 2.5 (-4.4, 9.3)                        |
| 30 months                              | 86.0 (76.6, 91.9) | 89.8 (81.1, 94.6) | -3.7 (-13.5, 6.1)                      |
| 36 months                              | 86.0 (76.6, 91.9) | 86.9 (77.3, 92.6) | -0.8 (-11.3, 9.6)                      |

CI= confidence interval. + Indicates censored observation. NE = not estimable.

[1] Estimated by Kaplan-Meier method.

[2] P value is from stratified log-rank test.

[3] Hazard ratio is estimated using stratified Cox regression model.

The randomization stratification factor used in both stratified log-rank test and Cox regression model is high-risk status based on del17p, del11q and TP53 mutation (yes, no). ECOG is not used because all subjects had ECOG 0-1.

**Supplemental Table 21. Best Response by Month 12 and Month 24**

|             | Ibr<br>(N = 104)<br>n (%) |           |           |           | Ibr+R<br>(N = 104)<br>n (%) |           |           |         |
|-------------|---------------------------|-----------|-----------|-----------|-----------------------------|-----------|-----------|---------|
|             | ORR                       | CR/CRi    | PR/PRn    | PRL       | ORR                         | CR/CRi    | PR/PRn    | PRL     |
| By Month 12 | 96 (92.3)                 | 6 (5.8)   | 71 (68.3) | 19 (18.3) | 96 (92.3)                   | 18 (17.3) | 71 (68.3) | 7 (6.7) |
| By Month 24 | 96 (92.3)                 | 19 (18.3) | 66 (63.5) | 11 (10.6) | 96 (92.3)                   | 26 (25.0) | 66 (63.5) | 4 (3.8) |

N = number of subjects in each subgroup. n=number of subjects with response. % = n/N.

# Supplemental Figures

## Supplemental Figure 1

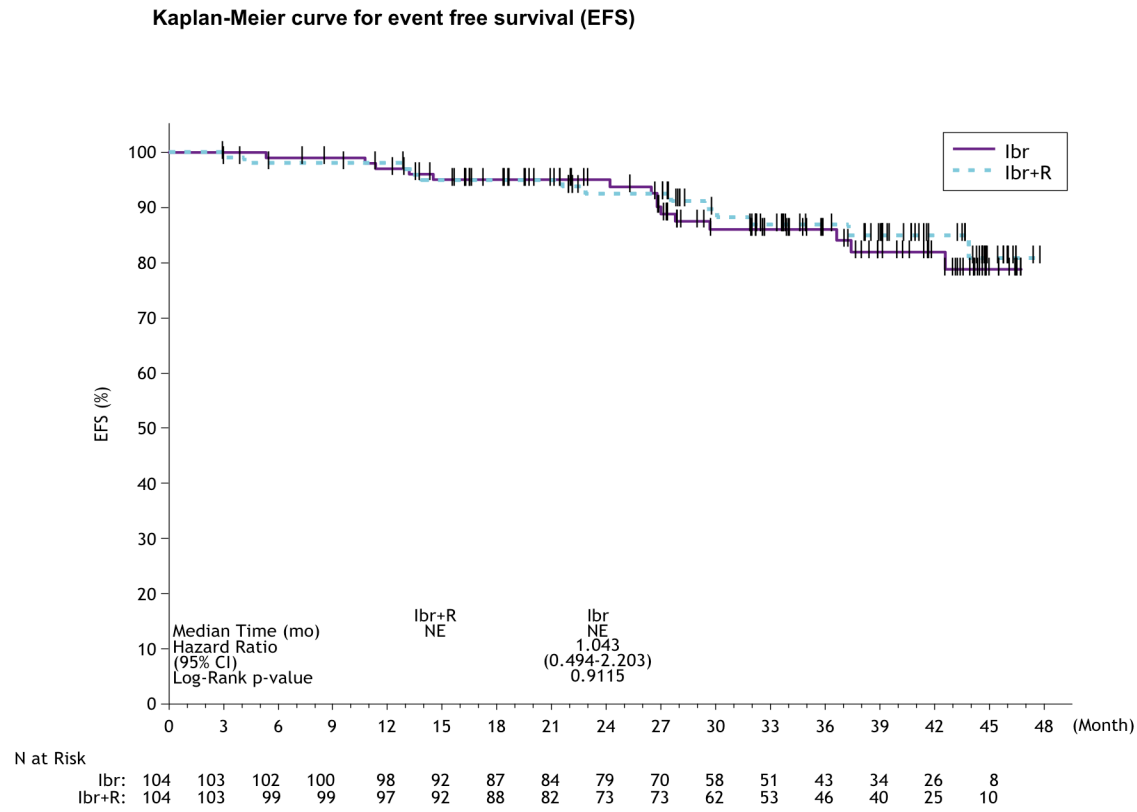

Supplemental Figure 2

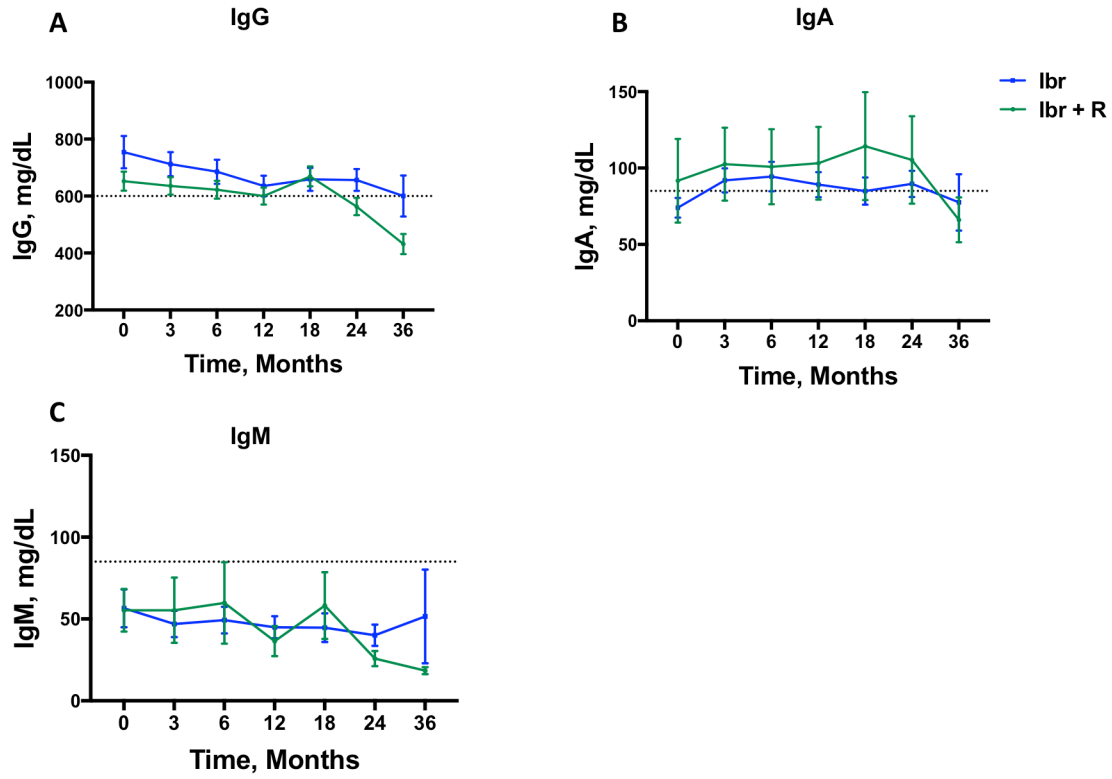

Supplemental Figure 3

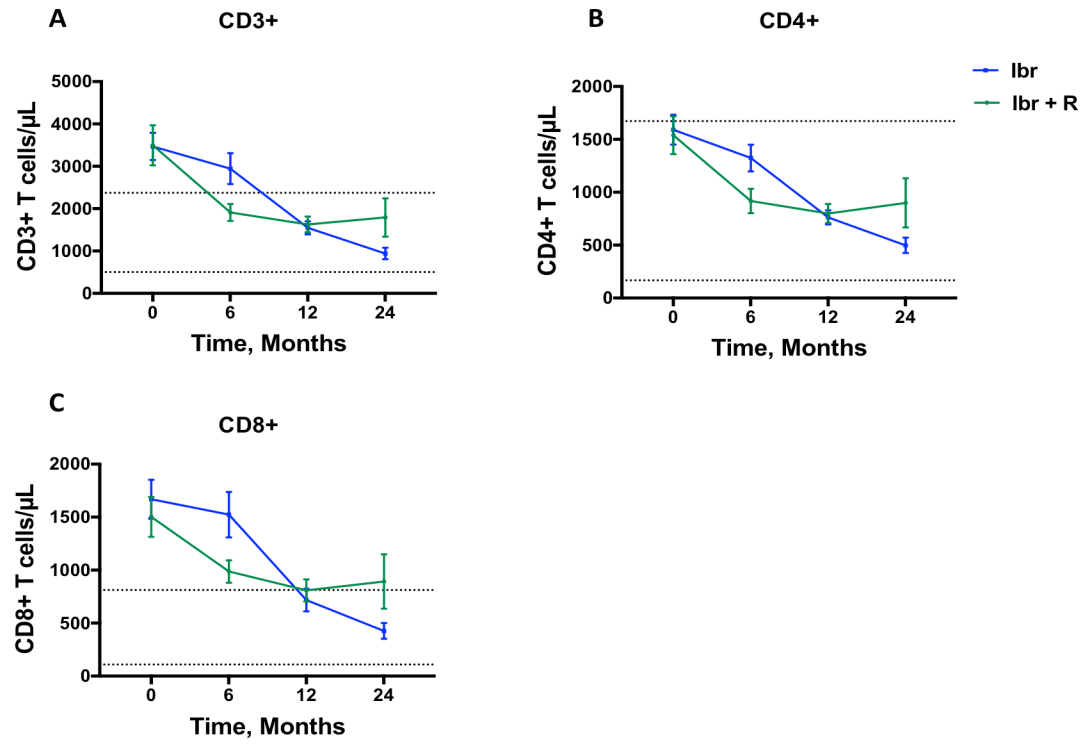

Supplement: blood879429-suppl1.pdf [file blood879429-suppl1.pdf]
